# Supplementary material for: Tales of treatment and new perspectives for global health research on antimicrobial resistance
Source: PubMed Central journal article supplement (PMC8639946; doi:10.1136/medhum-2020-011894), 2020-09-18
Supplement: medhum-2020-011894supp001.pdf [file medhum-2020-011894supp001.pdf]

OxTREC reference: 528-17

## ANTIBIOTICS AND ACTIVITY SPACES

| 1. Village Checklist (GPS coordinates of village and facilities) (to be completed by supervisor)                 |                                                  |                                                     |
|------------------------------------------------------------------------------------------------------------------|--------------------------------------------------|-----------------------------------------------------|
| What kind of facility would you like to record?                                                                  |                                                  |                                                     |
| A. District Number                                                                                               |                                                  | [code entered automatically]                        |
| B. Village Number                                                                                                |                                                  | [code entered automatically]                        |
| C. Village centre                                                                                                | a) Latitude                                      | [coordinates entered automatically]                 |
|                                                                                                                  | b) Longitude                                     | [coordinates entered automatically]                 |
| D. Village head's house                                                                                          | a) Latitude                                      | [coordinates entered automatically]                 |
|                                                                                                                  | b) Longitude                                     | [coordinates entered automatically]                 |
| E. Local shop                                                                                                    | a) Latitude                                      | [coordinates entered automatically]                 |
|                                                                                                                  | b) Longitude                                     | [coordinates entered automatically]                 |
| F. Market                                                                                                        | a) Latitude                                      | [coordinates entered automatically]                 |
|                                                                                                                  | b) Longitude                                     | [coordinates entered automatically]                 |
| G. Temple                                                                                                        | a) Latitude                                      | [coordinates entered automatically]                 |
|                                                                                                                  | b) Longitude                                     | [coordinates entered automatically]                 |
| H. School                                                                                                        | a) Latitude                                      | [coordinates entered automatically]                 |
|                                                                                                                  | b) Longitude                                     | [coordinates entered automatically]                 |
| I. Bus stop                                                                                                      | a) Latitude                                      | [coordinates entered automatically]                 |
|                                                                                                                  | b) Longitude                                     | [coordinates entered automatically]                 |
| J. Health facility<br>Specify (public, private,<br>pharmacy, local store,<br>traditional healer, etc.):<br>_____ | a) Latitude                                      | [coordinates entered automatically]                 |
|                                                                                                                  | b) Longitude                                     | [coordinates entered automatically]                 |
|                                                                                                                  | c) Who is staffing the facility?                 | Total staff: _____<br>Staff at time of visit: _____ |
|                                                                                                                  | d) Does the provider have antibiotics available? | Yes ..... 1<br>No ..... 0                           |

OxTREC reference: 528-17

## ANTIBIOTICS AND ACTIVITY SPACES

| Interview data [Record observation]                                                                                                                                                                                                                                                                                                                                                                                                                                                                                                                                                                                                                                                                                                                                                                                                                                                                                                                                                                                                                                                                                    |                                                                                                                                                                                                                                                                                                                                                                                                                                                                                                                                                                                           |                                     |          |                                           |     |                                           |  |  |  |  |  |  |  |  |  |  |  |  |  |  |  |
|------------------------------------------------------------------------------------------------------------------------------------------------------------------------------------------------------------------------------------------------------------------------------------------------------------------------------------------------------------------------------------------------------------------------------------------------------------------------------------------------------------------------------------------------------------------------------------------------------------------------------------------------------------------------------------------------------------------------------------------------------------------------------------------------------------------------------------------------------------------------------------------------------------------------------------------------------------------------------------------------------------------------------------------------------------------------------------------------------------------------|-------------------------------------------------------------------------------------------------------------------------------------------------------------------------------------------------------------------------------------------------------------------------------------------------------------------------------------------------------------------------------------------------------------------------------------------------------------------------------------------------------------------------------------------------------------------------------------------|-------------------------------------|----------|-------------------------------------------|-----|-------------------------------------------|--|--|--|--|--|--|--|--|--|--|--|--|--|--|--|
| i. District Number                                                                                                                                                                                                                                                                                                                                                                                                                                                                                                                                                                                                                                                                                                                                                                                                                                                                                                                                                                                                                                                                                                     | [code entered automatically]                                                                                                                                                                                                                                                                                                                                                                                                                                                                                                                                                              |                                     |          |                                           |     |                                           |  |  |  |  |  |  |  |  |  |  |  |  |  |  |  |
| ii. PSU Number                                                                                                                                                                                                                                                                                                                                                                                                                                                                                                                                                                                                                                                                                                                                                                                                                                                                                                                                                                                                                                                                                                         | [code entered automatically]                                                                                                                                                                                                                                                                                                                                                                                                                                                                                                                                                              |                                     |          |                                           |     |                                           |  |  |  |  |  |  |  |  |  |  |  |  |  |  |  |
| iii. Household number                                                                                                                                                                                                                                                                                                                                                                                                                                                                                                                                                                                                                                                                                                                                                                                                                                                                                                                                                                                                                                                                                                  | Number: _____                                                                                                                                                                                                                                                                                                                                                                                                                                                                                                                                                                             |                                     |          |                                           |     |                                           |  |  |  |  |  |  |  |  |  |  |  |  |  |  |  |
| iv. Household coordinates                                                                                                                                                                                                                                                                                                                                                                                                                                                                                                                                                                                                                                                                                                                                                                                                                                                                                                                                                                                                                                                                                              | a) Latitude                                                                                                                                                                                                                                                                                                                                                                                                                                                                                                                                                                               | [coordinates entered automatically] |          |                                           |     |                                           |  |  |  |  |  |  |  |  |  |  |  |  |  |  |  |
|                                                                                                                                                                                                                                                                                                                                                                                                                                                                                                                                                                                                                                                                                                                                                                                                                                                                                                                                                                                                                                                                                                                        | b) Longitude                                                                                                                                                                                                                                                                                                                                                                                                                                                                                                                                                                              | [coordinates entered automatically] |          |                                           |     |                                           |  |  |  |  |  |  |  |  |  |  |  |  |  |  |  |
| v. What type is this house most similar to?                                                                                                                                                                                                                                                                                                                                                                                                                                                                                                                                                                                                                                                                                                                                                                                                                                                                                                                                                                                                                                                                            | <div style="display: flex; flex-direction: column; align-items: center;"> <div style="display: flex; justify-content: space-around; width: 100%;">  </div> <div style="display: flex; justify-content: space-around; width: 100%;">  </div> <div style="display: flex; justify-content: space-around; width: 100%;">  </div> </div> |                                     |          |                                           |     |                                           |  |  |  |  |  |  |  |  |  |  |  |  |  |  |  |
| vi. Time of visit                                                                                                                                                                                                                                                                                                                                                                                                                                                                                                                                                                                                                                                                                                                                                                                                                                                                                                                                                                                                                                                                                                      | a) First visit                                                                                                                                                                                                                                                                                                                                                                                                                                                                                                                                                                            | [time entered automatically]        |          |                                           |     |                                           |  |  |  |  |  |  |  |  |  |  |  |  |  |  |  |
|                                                                                                                                                                                                                                                                                                                                                                                                                                                                                                                                                                                                                                                                                                                                                                                                                                                                                                                                                                                                                                                                                                                        | b) Second visit                                                                                                                                                                                                                                                                                                                                                                                                                                                                                                                                                                           | [time entered automatically]        |          |                                           |     |                                           |  |  |  |  |  |  |  |  |  |  |  |  |  |  |  |
| <b>List all persons aged 18+ years in household</b><br><p>Hello, I'm a researcher working for the Mahidol-Oxford Tropical Medicine Research Unit. We are interested in the lives and health behaviours of villagers across Thailand and Lao PDR. We are selecting participants randomly and would like to choose one or two members of your household. In order to choose and ask them to participate, could you please tell us who lives here? [provide PIS on request]</p> <p><b>[1 respondent per every 5 household members will be selected randomly from this list]</b></p> <table border="1" style="width: 100%; border-collapse: collapse;"> <thead> <tr> <th style="width: 20%;">Name</th> <th style="width: 15%;">Nickname</th> <th style="width: 15%;">Sex (M / F)</th> <th style="width: 15%;">Age</th> <th style="width: 35%;">Available for interview today? (Yes / No)</th> </tr> </thead> <tbody> <tr><td> </td><td> </td><td> </td><td> </td><td> </td></tr> <tr><td> </td><td> </td><td> </td><td> </td><td> </td></tr> <tr><td> </td><td> </td><td> </td><td> </td><td> </td></tr> </tbody> </table> |                                                                                                                                                                                                                                                                                                                                                                                                                                                                                                                                                                                           | Name                                | Nickname | Sex (M / F)                               | Age | Available for interview today? (Yes / No) |  |  |  |  |  |  |  |  |  |  |  |  |  |  |  |
| Name                                                                                                                                                                                                                                                                                                                                                                                                                                                                                                                                                                                                                                                                                                                                                                                                                                                                                                                                                                                                                                                                                                                   | Nickname                                                                                                                                                                                                                                                                                                                                                                                                                                                                                                                                                                                  | Sex (M / F)                         | Age      | Available for interview today? (Yes / No) |     |                                           |  |  |  |  |  |  |  |  |  |  |  |  |  |  |  |
|                                                                                                                                                                                                                                                                                                                                                                                                                                                                                                                                                                                                                                                                                                                                                                                                                                                                                                                                                                                                                                                                                                                        |                                                                                                                                                                                                                                                                                                                                                                                                                                                                                                                                                                                           |                                     |          |                                           |     |                                           |  |  |  |  |  |  |  |  |  |  |  |  |  |  |  |
|                                                                                                                                                                                                                                                                                                                                                                                                                                                                                                                                                                                                                                                                                                                                                                                                                                                                                                                                                                                                                                                                                                                        |                                                                                                                                                                                                                                                                                                                                                                                                                                                                                                                                                                                           |                                     |          |                                           |     |                                           |  |  |  |  |  |  |  |  |  |  |  |  |  |  |  |
|                                                                                                                                                                                                                                                                                                                                                                                                                                                                                                                                                                                                                                                                                                                                                                                                                                                                                                                                                                                                                                                                                                                        |                                                                                                                                                                                                                                                                                                                                                                                                                                                                                                                                                                                           |                                     |          |                                           |     |                                           |  |  |  |  |  |  |  |  |  |  |  |  |  |  |  |
| <b>Statement of consent (Respondent will receive participant information sheet and verbal consent will be taken)</b><br>Thank you for participating. You will receive a small token of gratitude for your participation at the end of the interview.                                                                                                                                                                                                                                                                                                                                                                                                                                                                                                                                                                                                                                                                                                                                                                                                                                                                   |                                                                                                                                                                                                                                                                                                                                                                                                                                                                                                                                                                                           |                                     |          |                                           |     |                                           |  |  |  |  |  |  |  |  |  |  |  |  |  |  |  |
| vii. Date of interview                                                                                                                                                                                                                                                                                                                                                                                                                                                                                                                                                                                                                                                                                                                                                                                                                                                                                                                                                                                                                                                                                                 | [date entered automatically]                                                                                                                                                                                                                                                                                                                                                                                                                                                                                                                                                              |                                     |          |                                           |     |                                           |  |  |  |  |  |  |  |  |  |  |  |  |  |  |  |
| viii. Time of interview begin                                                                                                                                                                                                                                                                                                                                                                                                                                                                                                                                                                                                                                                                                                                                                                                                                                                                                                                                                                                                                                                                                          | [time entered automatically]                                                                                                                                                                                                                                                                                                                                                                                                                                                                                                                                                              |                                     |          |                                           |     |                                           |  |  |  |  |  |  |  |  |  |  |  |  |  |  |  |
| ix. Respondent name                                                                                                                                                                                                                                                                                                                                                                                                                                                                                                                                                                                                                                                                                                                                                                                                                                                                                                                                                                                                                                                                                                    | Respondent name: _____                                                                                                                                                                                                                                                                                                                                                                                                                                                                                                                                                                    |                                     |          |                                           |     |                                           |  |  |  |  |  |  |  |  |  |  |  |  |  |  |  |
| x. Interviewer code                                                                                                                                                                                                                                                                                                                                                                                                                                                                                                                                                                                                                                                                                                                                                                                                                                                                                                                                                                                                                                                                                                    | [code entered automatically]                                                                                                                                                                                                                                                                                                                                                                                                                                                                                                                                                              |                                     |          |                                           |     |                                           |  |  |  |  |  |  |  |  |  |  |  |  |  |  |  |
| <b>Part I: Personal and Household Characteristics</b><br>Let us begin with a few questions about yourself and your household.                                                                                                                                                                                                                                                                                                                                                                                                                                                                                                                                                                                                                                                                                                                                                                                                                                                                                                                                                                                          |                                                                                                                                                                                                                                                                                                                                                                                                                                                                                                                                                                                           |                                     |          |                                           |     |                                           |  |  |  |  |  |  |  |  |  |  |  |  |  |  |  |
| 1. [record as observed] Sex                                                                                                                                                                                                                                                                                                                                                                                                                                                                                                                                                                                                                                                                                                                                                                                                                                                                                                                                                                                                                                                                                            | Female..... 1<br>Male ..... 0                                                                                                                                                                                                                                                                                                                                                                                                                                                                                                                                                             |                                     |          |                                           |     |                                           |  |  |  |  |  |  |  |  |  |  |  |  |  |  |  |
| 2. How old are you? [in years] [if respondent cannot give exact age, ask for approximate age and code in range: 18-24, 25-34, 35-44, 45-59, 60 and older]                                                                                                                                                                                                                                                                                                                                                                                                                                                                                                                                                                                                                                                                                                                                                                                                                                                                                                                                                              | Age in years: _____                                                                                                                                                                                                                                                                                                                                                                                                                                                                                                                                                                       |                                     |          |                                           |     |                                           |  |  |  |  |  |  |  |  |  |  |  |  |  |  |  |
| 3. Please indicate what kind of work you do. If you have more than one occupation at one time or throughout the year, please begin with the one in which you spend the most time and name up to three. If you do not have an occupation, please also mention whether you are still a student, retired, or unemployed.                                                                                                                                                                                                                                                                                                                                                                                                                                                                                                                                                                                                                                                                                                                                                                                                  | a) Main occupation                                                                                                                                                                                                                                                                                                                                                                                                                                                                                                                                                                        | Occupation: _____                   |          |                                           |     |                                           |  |  |  |  |  |  |  |  |  |  |  |  |  |  |  |
|                                                                                                                                                                                                                                                                                                                                                                                                                                                                                                                                                                                                                                                                                                                                                                                                                                                                                                                                                                                                                                                                                                                        | b) Side occupation                                                                                                                                                                                                                                                                                                                                                                                                                                                                                                                                                                        | Occupation: _____                   |          |                                           |     |                                           |  |  |  |  |  |  |  |  |  |  |  |  |  |  |  |
|                                                                                                                                                                                                                                                                                                                                                                                                                                                                                                                                                                                                                                                                                                                                                                                                                                                                                                                                                                                                                                                                                                                        | c) Side occupation                                                                                                                                                                                                                                                                                                                                                                                                                                                                                                                                                                        | Occupation: _____                   |          |                                           |     |                                           |  |  |  |  |  |  |  |  |  |  |  |  |  |  |  |
| 4. What is your mother tongue?                                                                                                                                                                                                                                                                                                                                                                                                                                                                                                                                                                                                                                                                                                                                                                                                                                                                                                                                                                                                                                                                                         | Mother tongue: _____                                                                                                                                                                                                                                                                                                                                                                                                                                                                                                                                                                      |                                     |          |                                           |     |                                           |  |  |  |  |  |  |  |  |  |  |  |  |  |  |  |
| 5. [In Thailand:] Can you speak Thai? [In Laos:] Can you speak Lao?                                                                                                                                                                                                                                                                                                                                                                                                                                                                                                                                                                                                                                                                                                                                                                                                                                                                                                                                                                                                                                                    | Yes ..... 1<br>No ..... 0                                                                                                                                                                                                                                                                                                                                                                                                                                                                                                                                                                 |                                     |          |                                           |     |                                           |  |  |  |  |  |  |  |  |  |  |  |  |  |  |  |
| 6. What is the highest grade of schooling that you completed?<br>[excluding informal education and pre-school education such as nursery and kindergarten, but including grade school, high school, vocational training, tertiary education, etc.]                                                                                                                                                                                                                                                                                                                                                                                                                                                                                                                                                                                                                                                                                                                                                                                                                                                                      | Highest grade: ____                                                                                                                                                                                                                                                                                                                                                                                                                                                                                                                                                                       |                                     |          |                                           |     |                                           |  |  |  |  |  |  |  |  |  |  |  |  |  |  |  |
| 7. Are you the head of your household?                                                                                                                                                                                                                                                                                                                                                                                                                                                                                                                                                                                                                                                                                                                                                                                                                                                                                                                                                                                                                                                                                 | Yes .....1<br>No .....0                                                                                                                                                                                                                                                                                                                                                                                                                                                                                                                                                                   |                                     |          |                                           |     |                                           |  |  |  |  |  |  |  |  |  |  |  |  |  |  |  |
| 7.1. [if no] What is the name of your household head?                                                                                                                                                                                                                                                                                                                                                                                                                                                                                                                                                                                                                                                                                                                                                                                                                                                                                                                                                                                                                                                                  | Name: _____                                                                                                                                                                                                                                                                                                                                                                                                                                                                                                                                                                               |                                     |          |                                           |     |                                           |  |  |  |  |  |  |  |  |  |  |  |  |  |  |  |

OxTREC reference: 528-17

## ANTIBIOTICS AND ACTIVITY SPACES

|                                                                                                                                                                                       |                                                                                                                                                                                                       |                                                                                       |
|---------------------------------------------------------------------------------------------------------------------------------------------------------------------------------------|-------------------------------------------------------------------------------------------------------------------------------------------------------------------------------------------------------|---------------------------------------------------------------------------------------|
| 8. What is your current marital status?                                                                                                                                               | Never married..... 1<br>Currently married ..... 2<br>Cohabiting..... 3<br>Separated / divorced ..... 4<br>Widowed..... 5                                                                              |                                                                                       |
| 9. Are there any close family members of yours (children, spouse, siblings, parents) who live elsewhere? [select "no" if not applicable]                                              | 9.1. Do your parents live outside of this village? [ <b>do not count parents-in-law</b> ]                                                                                                             | At least 1 person outside village .... 1<br>All inside village / not applicable.... 0 |
|                                                                                                                                                                                       | 9.2. Does your spouse live outside of this village?                                                                                                                                                   | At least 1 person outside village .... 1<br>All inside village / not applicable.... 0 |
|                                                                                                                                                                                       | 9.3. Do you have siblings who live outside of this village? [ <b>do not count brothers-in-law and sisters-in-law</b> ]                                                                                | At least 1 person outside village .... 1<br>All inside village / not applicable.... 0 |
|                                                                                                                                                                                       | 9.4. Do you have children who live outside of this village?                                                                                                                                           | At least 1 person outside village .... 1<br>All inside village / not applicable.... 0 |
| <b>Part II: Social Networks [for network census villages only]</b><br>I will now ask you some questions about your interactions with other people within and outside of your village. |                                                                                                                                                                                                       |                                                                                       |
| 10. [Round I of network survey only] Where do you spend most of your time interacting with other people from your village?                                                            | a) Field: ____<br>b) Temple: ____<br>c) Local store: ____<br>d) Market: ____<br>e) Children's schools: ____<br>f) Home: ____<br>g) Workplace: ____<br>h) Village event/s: ____<br>i) Other site: ____ |                                                                                       |

OxTREC reference: 528-17

**ANTIBIOTICS AND ACTIVITY SPACES**

| 11. [Round I of network survey only] Outside your household, with whom do you interact on a regular basis? (May be anyone from both inside and outside of the village, and through any platform which might not require a face-to-face interaction) |                                        |                                                                                                                                                                                                           |                                    |                                                                |                                                           |                                                                                                                                                                  |                                                                                    |                                                           |
|-----------------------------------------------------------------------------------------------------------------------------------------------------------------------------------------------------------------------------------------------------|----------------------------------------|-----------------------------------------------------------------------------------------------------------------------------------------------------------------------------------------------------------|------------------------------------|----------------------------------------------------------------|-----------------------------------------------------------|------------------------------------------------------------------------------------------------------------------------------------------------------------------|------------------------------------------------------------------------------------|-----------------------------------------------------------|
|                                                                                                                                                                                                                                                     | a) What is the nickname of the person? | b) How is this person related to you?<br>[give examples if respondent is unsure about answer categories]                                                                                                  | c) What is the sex of this person? | d) Where does this person live?                                | e) What is the name of the household head of this person? | f) How often do you interact with this person?                                                                                                                   | g) How do you interact with this person?<br>[Mark all that apply]                  | h) Do your conversations relate to health and well-being? |
| 11.1.<br>Contact 1                                                                                                                                                                                                                                  | Nickname _____<br>Name _____           | Spouse..... 1<br>Parent..... 2<br>Child..... 3<br>Sibling..... 4<br>Other relative ..... 5<br>Neighbour..... 6<br>Friend (if not neighbour)..... 7<br>Other villager ..... 8<br>Other (specify) _ ..... 9 | Female...1<br>Male .....0          | In village ..... 1<br>(specify: _____)<br>Outside village .. 2 | Name of household head<br>_____                           | Daily or more often .....4<br>Weekly or few times/week .....3<br>Monthly or few times/month ...2<br>Yearly or few times/year .....1<br>Less often or never.....0 | Face-to-face...1<br>Voice call.....2<br>Messenger .....3<br>Other (specify) _____4 | Yes ..... 1<br>No ..... 0                                 |
| 11.2.<br>Contact n                                                                                                                                                                                                                                  | Nickname<br>Name                       | 1 2 3 4 5 6 7 8 9                                                                                                                                                                                         | 1 0                                | 1 2                                                            | Name                                                      | 0 1 2 3 4                                                                                                                                                        | 1 2 3 4                                                                            | 1 0                                                       |
| 11a. [Round II of network survey only] When we last visited you, you told us that you interact regularly with [names]. Has anything changed since last time?                                                                                        |                                        |                                                                                                                                                                                                           |                                    | Yes .....1<br>No .....0 → [update social network question 11]  |                                                           |                                                                                                                                                                  |                                                                                    |                                                           |
| 11i. [Round I of network survey only] Is there anybody in your household with whom you talk about health and well-being? [Mark all that apply]                                                                                                      |                                        |                                                                                                                                                                                                           |                                    | [mark all names from household roster that apply]              |                                                           |                                                                                                                                                                  |                                                                                    |                                                           |

OxTREC reference: 528-17

**ANTIBIOTICS AND ACTIVITY SPACES**

|                                                                                                                                                                                                                                                                                                                                                                                            |                                                                                                                                                                  |                                   |    |
|--------------------------------------------------------------------------------------------------------------------------------------------------------------------------------------------------------------------------------------------------------------------------------------------------------------------------------------------------------------------------------------------|------------------------------------------------------------------------------------------------------------------------------------------------------------------|-----------------------------------|----|
| <i>[For network survey village respondents in Round 2]</i>                                                                                                                                                                                                                                                                                                                                 |                                                                                                                                                                  |                                   |    |
| <b>12.</b> An education activity has recently taken place in your village.                                                                                                                                                                                                                                                                                                                 |                                                                                                                                                                  |                                   |    |
| <b>12.1.</b> Did you participate in any of the activities?                                                                                                                                                                                                                                                                                                                                 | Yes .....                                                                                                                                                        | 1                                 |    |
|                                                                                                                                                                                                                                                                                                                                                                                            | Yes, but not throughout.....                                                                                                                                     | 2                                 |    |
|                                                                                                                                                                                                                                                                                                                                                                                            | No .....                                                                                                                                                         | 3                                 |    |
|                                                                                                                                                                                                                                                                                                                                                                                            | Don't know / prefer not to say .....                                                                                                                             | 4                                 |    |
| <b>12.2.</b> Did you talk with anybody about the activity in your village?<br><i>["Talking" can involve any conversation including asking for information, informing about the educational activity, or discussing it (regardless of actual attendance)]</i>                                                                                                                               | a) Nickname 1: _____ b) Full name 1: _____ c) Relationship 1: 1 2 3 4 5 6 7                                                                                      |                                   |    |
|                                                                                                                                                                                                                                                                                                                                                                                            | a) Nickname n: _____ b) Full name n: _____ c) Relationship n: 1 2 3 4 5 6 7                                                                                      |                                   |    |
|                                                                                                                                                                                                                                                                                                                                                                                            | <i>[Relationship codes]</i>                                                                                                                                      |                                   |    |
|                                                                                                                                                                                                                                                                                                                                                                                            | Household member .....                                                                                                                                           | 1                                 |    |
|                                                                                                                                                                                                                                                                                                                                                                                            | Family member outside HH.....                                                                                                                                    | 2                                 |    |
|                                                                                                                                                                                                                                                                                                                                                                                            | Other relative .....                                                                                                                                             | 3                                 |    |
|                                                                                                                                                                                                                                                                                                                                                                                            | Neighbour.....                                                                                                                                                   | 4                                 |    |
|                                                                                                                                                                                                                                                                                                                                                                                            | Friend other than neighbour.....                                                                                                                                 | 5                                 |    |
|                                                                                                                                                                                                                                                                                                                                                                                            | Other villager.....                                                                                                                                              | 6                                 |    |
|                                                                                                                                                                                                                                                                                                                                                                                            | Other (specify) _ .....                                                                                                                                          | 7                                 |    |
| <i>[If respondent indicates conversation in Q 12.2]</i>                                                                                                                                                                                                                                                                                                                                    |                                                                                                                                                                  |                                   |    |
| <b>12.3.</b> What subjects did you talk about in respect to the activity?<br><i>[mark all that apply]</i>                                                                                                                                                                                                                                                                                  | Going to doctor when sick.....                                                                                                                                   | 1                                 |    |
|                                                                                                                                                                                                                                                                                                                                                                                            | Anti-inflammatories/antibiotics .....                                                                                                                            | 2                                 |    |
|                                                                                                                                                                                                                                                                                                                                                                                            | Germs.....                                                                                                                                                       | 3                                 |    |
|                                                                                                                                                                                                                                                                                                                                                                                            | Using medicines correctly.....                                                                                                                                   | 4                                 |    |
|                                                                                                                                                                                                                                                                                                                                                                                            | Activity in general.....                                                                                                                                         | 5                                 |    |
|                                                                                                                                                                                                                                                                                                                                                                                            | Games/awards.....                                                                                                                                                | 6                                 |    |
|                                                                                                                                                                                                                                                                                                                                                                                            | Song/Story/Play.....                                                                                                                                             | 7                                 |    |
|                                                                                                                                                                                                                                                                                                                                                                                            | Money/compensation.....                                                                                                                                          | 8                                 |    |
|                                                                                                                                                                                                                                                                                                                                                                                            | Other (specify) _____.....                                                                                                                                       | 9                                 |    |
|                                                                                                                                                                                                                                                                                                                                                                                            | <b>Part III: Healthcare Seeking</b> Thank you for this. Now we come to a part where I will ask you some questions about health and health providers around here. |                                   |    |
| <b>13.</b> I would now like to ask you about the sources of health advice and medicine or other treatment that are available to you. Please think about all the places where you can go to get advice, treatment, or drugs if you (or your children) are sick.<br><br>Do you consider the following providers when you (or your children) feel unwell?<br><br><i>[Mark all that apply]</i> | <b>13.1.</b> Drug dispensary, other local store selling medicine                                                                                                 | Consultation .....                | 1  |
|                                                                                                                                                                                                                                                                                                                                                                                            |                                                                                                                                                                  | Medical advice.....               | 2  |
|                                                                                                                                                                                                                                                                                                                                                                                            |                                                                                                                                                                  | Access to medicine.....           | 3  |
|                                                                                                                                                                                                                                                                                                                                                                                            |                                                                                                                                                                  | Other reason(s) .....             | 4  |
|                                                                                                                                                                                                                                                                                                                                                                                            |                                                                                                                                                                  | Don't consider this provider..... | 98 |
|                                                                                                                                                                                                                                                                                                                                                                                            | Don't know such a provider .....                                                                                                                                 | 99                                |    |
|                                                                                                                                                                                                                                                                                                                                                                                            | <b>13.2.</b> Traditional healer                                                                                                                                  | Consultation .....                | 1  |
|                                                                                                                                                                                                                                                                                                                                                                                            |                                                                                                                                                                  | Medical advice.....               | 2  |
|                                                                                                                                                                                                                                                                                                                                                                                            |                                                                                                                                                                  | Access to medicine.....           | 3  |
|                                                                                                                                                                                                                                                                                                                                                                                            |                                                                                                                                                                  | Other reason(s) .....             | 4  |
|                                                                                                                                                                                                                                                                                                                                                                                            |                                                                                                                                                                  | Don't consider this provider..... | 98 |
|                                                                                                                                                                                                                                                                                                                                                                                            | Don't know such a provider .....                                                                                                                                 | 99                                |    |
|                                                                                                                                                                                                                                                                                                                                                                                            | <b>13.3.</b> Pharmacist                                                                                                                                          | Consultation .....                | 1  |
|                                                                                                                                                                                                                                                                                                                                                                                            |                                                                                                                                                                  | Medical advice.....               | 2  |
| Access to medicine.....                                                                                                                                                                                                                                                                                                                                                                    |                                                                                                                                                                  | 3                                 |    |
| Other reason(s) .....                                                                                                                                                                                                                                                                                                                                                                      |                                                                                                                                                                  | 4                                 |    |
| Don't consider this provider.....                                                                                                                                                                                                                                                                                                                                                          |                                                                                                                                                                  | 98                                |    |
| Don't know such a provider .....                                                                                                                                                                                                                                                                                                                                                           | 99                                                                                                                                                               |                                   |    |
| <b>13.4.</b> Private clinic                                                                                                                                                                                                                                                                                                                                                                | Consultation .....                                                                                                                                               | 1                                 |    |
|                                                                                                                                                                                                                                                                                                                                                                                            | Medical advice.....                                                                                                                                              | 2                                 |    |
|                                                                                                                                                                                                                                                                                                                                                                                            | Access to medicine.....                                                                                                                                          | 3                                 |    |
|                                                                                                                                                                                                                                                                                                                                                                                            | Other reason(s) .....                                                                                                                                            | 4                                 |    |
|                                                                                                                                                                                                                                                                                                                                                                                            | Don't consider this provider.....                                                                                                                                | 98                                |    |
| Don't know such a provider .....                                                                                                                                                                                                                                                                                                                                                           | 99                                                                                                                                                               |                                   |    |
| <b>13.5.</b> Private hospital                                                                                                                                                                                                                                                                                                                                                              | Consultation .....                                                                                                                                               | 1                                 |    |
|                                                                                                                                                                                                                                                                                                                                                                                            | Medical advice.....                                                                                                                                              | 2                                 |    |
|                                                                                                                                                                                                                                                                                                                                                                                            | Access to medicine.....                                                                                                                                          | 3                                 |    |
|                                                                                                                                                                                                                                                                                                                                                                                            | Other reason(s) .....                                                                                                                                            | 4                                 |    |
|                                                                                                                                                                                                                                                                                                                                                                                            | Don't consider this provider.....                                                                                                                                | 98                                |    |
| Don't know such a provider .....                                                                                                                                                                                                                                                                                                                                                           | 99                                                                                                                                                               |                                   |    |
| <b>13.6.</b> Health volunteer                                                                                                                                                                                                                                                                                                                                                              | Consultation .....                                                                                                                                               | 1                                 |    |
|                                                                                                                                                                                                                                                                                                                                                                                            | Medical advice.....                                                                                                                                              | 2                                 |    |
|                                                                                                                                                                                                                                                                                                                                                                                            | Access to medicine.....                                                                                                                                          | 3                                 |    |
|                                                                                                                                                                                                                                                                                                                                                                                            | Other reason(s) .....                                                                                                                                            | 4                                 |    |
|                                                                                                                                                                                                                                                                                                                                                                                            | Don't consider this provider.....                                                                                                                                | 98                                |    |
| Don't know such a provider .....                                                                                                                                                                                                                                                                                                                                                           | 99                                                                                                                                                               |                                   |    |
| <b>13.7.</b> Public primary care unit                                                                                                                                                                                                                                                                                                                                                      | Consultation .....                                                                                                                                               | 1                                 |    |
|                                                                                                                                                                                                                                                                                                                                                                                            | Medical advice.....                                                                                                                                              | 2                                 |    |
|                                                                                                                                                                                                                                                                                                                                                                                            | Access to medicine.....                                                                                                                                          | 3                                 |    |
|                                                                                                                                                                                                                                                                                                                                                                                            | Other reason(s) .....                                                                                                                                            | 4                                 |    |
|                                                                                                                                                                                                                                                                                                                                                                                            | Don't consider this provider.....                                                                                                                                | 98                                |    |
| Don't know such a provider .....                                                                                                                                                                                                                                                                                                                                                           | 99                                                                                                                                                               |                                   |    |

OxTREC reference: 528-17

**ANTIBIOTICS AND ACTIVITY SPACES**

|                                   |                                                                |                                    |    |
|-----------------------------------|----------------------------------------------------------------|------------------------------------|----|
|                                   | <b>13.8.</b> Public hospital                                   | Consultation .....                 | 1  |
|                                   |                                                                | Medical advice.....                | 2  |
|                                   |                                                                | Access to medicine.....            | 3  |
|                                   |                                                                | Other reason(s) .....              | 4  |
|                                   |                                                                | Don't consider this provider ..... | 98 |
|                                   | Don't know such a provider .....                               | 99                                 |    |
|                                   | <b>13.9.</b> Other providers<br>or Internet? Specify:<br>_____ | Consultation .....                 | 1  |
|                                   |                                                                | Medical advice.....                | 2  |
|                                   |                                                                | Access to medicine.....            | 3  |
|                                   |                                                                | Other reason(s) .....              | 4  |
| Don't consider this provider..... |                                                                | 98                                 |    |
| Don't know such a provider .....  | 99                                                             |                                    |    |

OxTREC reference: 528-17

## ANTIBIOTICS AND ACTIVITY SPACES

| 14. Now if you think again, is there anyone else with whom you talk about health? |                                        |                                         |                                                                                                                                                                                                              |                                    |                                                                    |                                                           |                                                                                                                                                                   |                                                                                          |
|-----------------------------------------------------------------------------------|----------------------------------------|-----------------------------------------|--------------------------------------------------------------------------------------------------------------------------------------------------------------------------------------------------------------|------------------------------------|--------------------------------------------------------------------|-----------------------------------------------------------|-------------------------------------------------------------------------------------------------------------------------------------------------------------------|------------------------------------------------------------------------------------------|
|                                                                                   | a) What is the nickname of the person? | b) What is the full name of the person? | c) How is this person related to you?<br>[give examples if respondent is unsure about answer categories]                                                                                                     | d) What is the sex of this person? | e) Where does this person live?                                    | f) What is the name of the household head of this person? | g) How often do you interact with this person?                                                                                                                    | h) How do you interact with this person?<br><br>[Mark all that apply]                    |
| 14.1.<br>Contact 1                                                                | Name _____                             | Name _____                              | Spouse..... 1<br>Parent ..... 2<br>Child ..... 3<br>Sibling..... 4<br>Other relative ..... 5<br>Neighbour ..... 6<br>Friend (if not neighbour)..... 7<br>Other villager ..... 8<br>Other (specify) _ ..... 9 | Female ..1<br>Male .....0          | In village ..... 1<br>(specify: _____)<br><br>Outside village .. 2 | Name of household head<br>_____                           | Daily or more often .....4<br>Weekly or few times/week .....3<br>Monthly or few times/month ...2<br>Yearly or few times/year .....1<br>Less often or never .....0 | Face-to-face..... 1<br>Voice call..... 2<br>Messenger ..... 3<br>Other (specify) _____ 4 |
| 14.2.<br>Contact n                                                                | Name                                   | Name                                    | 1 2 3 4 5 6 7 8 9                                                                                                                                                                                            | 1 0                                | 1 2                                                                | Name                                                      | 0 1 2 3 4                                                                                                                                                         | 1 2 3 4                                                                                  |

OxTREC reference: 528-17

ANTIBIOTICS AND ACTIVITY SPACES

|                                                                                                                                                                                                                                                                                                                                                                                                                             |  |                                                                                                                                                                                                                                                                                                                                                                                                                                                                 |
|-----------------------------------------------------------------------------------------------------------------------------------------------------------------------------------------------------------------------------------------------------------------------------------------------------------------------------------------------------------------------------------------------------------------------------|--|-----------------------------------------------------------------------------------------------------------------------------------------------------------------------------------------------------------------------------------------------------------------------------------------------------------------------------------------------------------------------------------------------------------------------------------------------------------------|
| <p>15. Did you or a child in your household have an acute illness (not a chronic, long-term condition that comes again and again) or an accident in the last two months? If yes, I will ask you about these illnesses one-by-one. <b>[if no, continue with Question 19]</b></p>                                                                                                                                             |  | No.....0 → [Q 16]<br>Yes.....1 ↓                                                                                                                                                                                                                                                                                                                                                                                                                                |
| <p><b>[if yes:]</b><br/>                 15.a [Confirm if this episode is for respondent or child]</p>                                                                                                                                                                                                                                                                                                                      |  | Respondent .....1 → [Q 15.1]<br>Child .....2                                                                                                                                                                                                                                                                                                                                                                                                                    |
| <p>15.b How old is the child?</p>                                                                                                                                                                                                                                                                                                                                                                                           |  | Age in years: _____                                                                                                                                                                                                                                                                                                                                                                                                                                             |
| <p>15.c Is the child female or male</p>                                                                                                                                                                                                                                                                                                                                                                                     |  | Female .....1<br>Male .....0                                                                                                                                                                                                                                                                                                                                                                                                                                    |
| <p>15.1. Can you please describe the symptoms or problem in your own words?</p>                                                                                                                                                                                                                                                                                                                                             |  | Description of condition: _____                                                                                                                                                                                                                                                                                                                                                                                                                                 |
| <p>15.2. Did [you / the child] receive a diagnosis of the illness from any medical provide, friend, or internet source?<br/><br/>                 If so, can you please describe the diagnosis of the illness if you received any and where [you / the child] received it? <b>[note: the diagnosis might be given by any medical provider including untrained and informal. Record all diagnoses if more than one.]</b></p> |  | a) Diagnosis 1: _____ b) Medical provider 1: 1 2 3 4 5 6 7 8<br>a) Diagnosis n: _____ b) Medical provider n: 1 2 3 4 5 6 7 8<br><br><b>[Response codes]</b><br>Drug dispensary, other local store selling medicine .....1<br>Traditional healer.....2<br>Pharmacist .....3<br>Private clinic.....4<br>Private hospital .....5<br>Primary care unit .....6<br>Public hospital.....7<br>Other providers or Internet? Specify: .....8                              |
| <p>15.3. When did [you / the child] experience the accident/discomfort (for the first time)</p>                                                                                                                                                                                                                                                                                                                             |  | Onset: ___ days / ___ weeks / ___ months ago                                                                                                                                                                                                                                                                                                                                                                                                                    |
| <p>15.4. Would you describe the illness/accident as “mild,” “moderate,” or “severe”?</p>                                                                                                                                                                                                                                                                                                                                    |  | Mild .....1<br>Moderate.....2<br>Severe .....3                                                                                                                                                                                                                                                                                                                                                                                                                  |
| <p>15.5. Can you please explain the stages of the treatment? I will ask you step-by-step what you did, starting from the moment [you / the child] first experienced a discomfort.</p>                                                                                                                                                                                                                                       |  |                                                                                                                                                                                                                                                                                                                                                                                                                                                                 |
| <p>15.5.1. Step 1 (detection)</p>                                                                                                                                                                                                                                                                                                                                                                                           |  | Step n                                                                                                                                                                                                                                                                                                                                                                                                                                                          |
| <p>a) What kind of help or treatment did you get at this stage? <b>[if unsure, specify]</b></p>                                                                                                                                                                                                                                                                                                                             |  | Ignored /did nothing .....1 1<br>Self-care (sleep, rest, medicine at home) .....2 2<br>Care from family and friends (full-time).....3 3<br>Treated/consulted at a traditional healer .....4 4<br>Treated/cons. at a pharmacist.....5 5<br>Treated/cons. at shop selling drugs.....6 6<br>Treated/cons. at priv. clinic/hospital.....7 7<br>Treated/cons. at primary care unit.....8 8<br>Treated/cons. at a gvt. Hospital.....9 9<br>Other (specify) _____10 10 |
| <p>b) Where did this activity take place?</p>                                                                                                                                                                                                                                                                                                                                                                               |  | At home .....1 1<br>Less than 10 min. from home.....2 2<br>10 to 29 min. ....3 3<br>30 to 59 min. ....4 4<br>60 to 119 min. ....5 5<br>2 hours or more from home.....6 6                                                                                                                                                                                                                                                                                        |
| <p>c) How did [you / the child] get to the place of the activity? <b>[select “at home” according to prior responses]</b></p>                                                                                                                                                                                                                                                                                                |  | At home .....1 1<br>Walk .....2 2<br>Own bicycle .....3 3<br>Own motorcycle / Three-wheeler .....4 4<br>Own car / four-wheeler .....5 5<br>Taxi or other hired ride .....6 6<br>Public transport.....7 7<br>Other (specify) ___ .....8 8                                                                                                                                                                                                                        |
| <p>d) How long did this stage last? <b>[let respondent choose category; if &lt;1 day, code “1” day]</b></p>                                                                                                                                                                                                                                                                                                                 |  | Duration:<br>___ days<br>___ weeks<br>___ months                                                                                                                                                                                                                                                                                                                                                                                                                |
| <p>e) Can you please name or describe all the medicines that you received or were prescribed during this step?<br/><br/> <b>[include medicine stored at home if “self-care at home”] [continue for all medicines received, then complete Questions g to k for each medicine individually]</b></p>                                                                                                                           |  |  Medicine 1:<br>Name/description: _____<br>Medicine n:<br>Name/description: _____<br>Medicine 1<br>Medicine n                                                                                                                                                                                                                                                               |
| <p>f) For how long did [you / the child] take the medicine? <b>[let respondent choose category; if more than one repeated episode, indicate total duration] [for each medicine individually]</b></p>                                                                                                                                                                                                                        |  | Duration:<br>___ days<br>___ weeks<br>___ months                                                                                                                                                                                                                                                                                                                                                                                                                |



OxTREC reference: 528-17

**ANTIBIOTICS AND ACTIVITY SPACES**

|                                                                                                                                                                                          |                                    |                                                                                                                                                                                                                                                                                                                                                                                                                    |                                                                                                                                                                                                                                                                                                                                                                                                                    |
|------------------------------------------------------------------------------------------------------------------------------------------------------------------------------------------|------------------------------------|--------------------------------------------------------------------------------------------------------------------------------------------------------------------------------------------------------------------------------------------------------------------------------------------------------------------------------------------------------------------------------------------------------------------|--------------------------------------------------------------------------------------------------------------------------------------------------------------------------------------------------------------------------------------------------------------------------------------------------------------------------------------------------------------------------------------------------------------------|
| g) How often per day did [you / the child] take the medicine?<br><i>[calculate into daily use according to respondent's chosen frequency]</i><br><i>[for each medicine individually]</i> |                                    | Frequency: ___ times daily                                                                                                                                                                                                                                                                                                                                                                                         | ___ times daily                                                                                                                                                                                                                                                                                                                                                                                                    |
| h) What dosage did [you / the child] normally take?<br><i>[let respondent choose category according to type of medicine]</i><br><i>[for each medicine individually]</i>                  |                                    | Dosage<br>___ tablets / capsules<br>___ drops (for liquid medicine)<br>___ spoons (for liquid medicine)<br>___ shots/injections (for intravenous medicine)<br>per time administered                                                                                                                                                                                                                                | ___ tablets<br>___ drops<br>___ spoons<br>___ shots                                                                                                                                                                                                                                                                                                                                                                |
| i) Did [you / the child] take the medicine exactly as it was recommended to you by the person who prescribed/sold them<br><i>[for each medicine individually]</i>                        |                                    | Yes .....1<br>No .....0<br>Did not receive advice .....9<br>Don't know .....99                                                                                                                                                                                                                                                                                                                                     | 1<br>2<br>9<br>99                                                                                                                                                                                                                                                                                                                                                                                                  |
| j) Did [you / the child] finish the medicine?<br><i>[for each medicine individually]</i>                                                                                                 |                                    | Yes .....1<br>No .....0                                                                                                                                                                                                                                                                                                                                                                                            | 1<br>0                                                                                                                                                                                                                                                                                                                                                                                                             |
| k) Did you or anybody else use a mobile phone during this stage in connection with your condition? <i>[if no, go to next step]</i>                                                       |                                    | Yes .....1<br>No .....0 → <i>[next step]</i>                                                                                                                                                                                                                                                                                                                                                                       | 1<br>0                                                                                                                                                                                                                                                                                                                                                                                                             |
| l) What was the purpose of using the mobile phone?<br><i>[Mark all that apply]</i>                                                                                                       |                                    | Ask for advice .....1<br>Call for treatment .....2<br>Arrange transport .....3<br>Appointment .....4<br>Reassure family/friends .....5<br>Ask for money/supplies .....6<br>Provider contacting me for information .....7<br>Treatment reminder .....8<br>Other (specify) _ .....9                                                                                                                                  | 1<br>2<br>3<br>4<br>5<br>6<br>7<br>8<br>9                                                                                                                                                                                                                                                                                                                                                                          |
| m) Which mobile phone functions did you or anybody else use?<br><i>[Mark all that apply]</i>                                                                                             |                                    | Call .....1<br>SMS .....2<br>Internet, messenger .....3<br>Alarm, calendar, reminder, etc. ....4<br>Other (specify) _ .....5                                                                                                                                                                                                                                                                                       | 1<br>2<br>3<br>4<br>5                                                                                                                                                                                                                                                                                                                                                                                              |
| 15.6. [Have you / has the child] now recovered from the illness/accident?                                                                                                                |                                    | Yes .....1<br>No .....0                                                                                                                                                                                                                                                                                                                                                                                            |                                                                                                                                                                                                                                                                                                                                                                                                                    |
| 15.7. Was anybody of your personal relationships involved in providing advice or help during the illness? <i>[record up to ten names]</i>                                                |                                    | Yes .....1<br>No .....0                                                                                                                                                                                                                                                                                                                                                                                            |                                                                                                                                                                                                                                                                                                                                                                                                                    |
| <i>[For district survey]</i><br>15.7.b How are these people related to you? <i>[Mark all that apply]</i>                                                                                 |                                    | Spouse .....1<br>Parent .....2<br>Child .....3<br>Sibling .....4<br>Other relative .....5<br>Neighbour .....6<br>Friend (if not neighbour) .....7<br>Other villager .....8<br>Other (specify) _ .....9                                                                                                                                                                                                             |                                                                                                                                                                                                                                                                                                                                                                                                                    |
| 15.7.c What kind of support did they provide? <i>[Mark all that apply]</i>                                                                                                               |                                    | Providing healthcare/attending .....11<br>Providing advice .....12<br>Providing medicine .....13<br>Lending/granting money .....21<br>Transportation/Lending vehicle .....22<br>Contacting family/friends .....23<br>Providing food .....31<br>Helping with children/housework .....32<br>Helping with jobs/agriculture work (feeding animals/tending crops/covering shifts, etc.) 33<br>Other (specify) _ .....99 |                                                                                                                                                                                                                                                                                                                                                                                                                    |
| <i>[For network survey]</i>                                                                                                                                                              | a) What is the name of the person? | b) How is this person related to you?                                                                                                                                                                                                                                                                                                                                                                              | c) What kind of support was provided?<br><i>[mark all that apply]</i>                                                                                                                                                                                                                                                                                                                                              |
| 15.7.1.<br>Contact 1                                                                                                                                                                     | Name:<br>_____                     | Spouse .....1<br>Parent .....2<br>Child .....3<br>Sibling .....4<br>Other relative .....5<br>Neighbour .....6<br>Friend (if not neighbour) .....7<br>Other villager .....8<br>Other (specify) _ .....9                                                                                                                                                                                                             | Providing healthcare/attending .....11<br>Providing advice .....12<br>Providing medicine .....13<br>Lending/granting money .....21<br>Transportation/Lending vehicle .....22<br>Contacting family/friends .....23<br>Providing food .....31<br>Helping with children/housework .....32<br>Helping with jobs/agriculture work (feeding animals/tending crops/covering shifts, etc.) 33<br>Other (specify) _ .....99 |
| 15.7.2.<br>Contact n                                                                                                                                                                     | Name                               | 1 2 3 4 5 6 7 8 9                                                                                                                                                                                                                                                                                                                                                                                                  | 11 12 13 21 22 23 31 32 33 99                                                                                                                                                                                                                                                                                                                                                                                      |

OxTREC reference: 528-17

ANTIBIOTICS AND ACTIVITY SPACES

|                                                                                                                                                                                                                                            |                                                                                                                                                                                                                                                                                                                                                                                                                                                                                                                                                                                                                                                                                                                                                                                                                                                                                                                                                                                                                                                                                                                                                                                                                                                                                                     |                                                                                     |                                    |                      |       |                                                            |                   |            |                                                                                   |       |             |                                                                                  |       |    |                                                                                 |                        |       |              |                      |             |                             |       |                |                                           |       |    |                          |           |       |                              |                |           |        |       |                        |                          |       |    |                             |             |       |                              |       |             |                                |       |      |                        |       |    |       |        |       |    |         |         |       |    |         |         |       |    |                        |  |       |  |
|--------------------------------------------------------------------------------------------------------------------------------------------------------------------------------------------------------------------------------------------|-----------------------------------------------------------------------------------------------------------------------------------------------------------------------------------------------------------------------------------------------------------------------------------------------------------------------------------------------------------------------------------------------------------------------------------------------------------------------------------------------------------------------------------------------------------------------------------------------------------------------------------------------------------------------------------------------------------------------------------------------------------------------------------------------------------------------------------------------------------------------------------------------------------------------------------------------------------------------------------------------------------------------------------------------------------------------------------------------------------------------------------------------------------------------------------------------------------------------------------------------------------------------------------------------------|-------------------------------------------------------------------------------------|------------------------------------|----------------------|-------|------------------------------------------------------------|-------------------|------------|-----------------------------------------------------------------------------------|-------|-------------|----------------------------------------------------------------------------------|-------|----|---------------------------------------------------------------------------------|------------------------|-------|--------------|----------------------|-------------|-----------------------------|-------|----------------|-------------------------------------------|-------|----|--------------------------|-----------|-------|------------------------------|----------------|-----------|--------|-------|------------------------|--------------------------|-------|----|-----------------------------|-------------|-------|------------------------------|-------|-------------|--------------------------------|-------|------|------------------------|-------|----|-------|--------|-------|----|---------|---------|-------|----|---------|---------|-------|----|------------------------|--|-------|--|
| <p><b>15.8.</b> Did <u>you</u> have another acute illness (not a chronic, long-term condition that comes again and again) or an accident in the last two months?<br/>                 [if yes, complete another sheet for Question 15]</p> |                                                                                                                                                                                                                                                                                                                                                                                                                                                                                                                                                                                                                                                                                                                                                                                                                                                                                                                                                                                                                                                                                                                                                                                                                                                                                                     | Yes ..... 1 → [Q 15]<br>No ..... 0 ↓                                                |                                    |                      |       |                                                            |                   |            |                                                                                   |       |             |                                                                                  |       |    |                                                                                 |                        |       |              |                      |             |                             |       |                |                                           |       |    |                          |           |       |                              |                |           |        |       |                        |                          |       |    |                             |             |       |                              |       |             |                                |       |      |                        |       |    |       |        |       |    |         |         |       |    |         |         |       |    |                        |  |       |  |
| <p><b>16.</b> I would now like to ask you your opinion about medicine. There are no right or wrong answers, I only want to understand what you think. Consider the following medicines:</p>                                                |                                                                                                                                                                                                                                                                                                                                                                                                                                                                                                                                                                                                                                                                                                                                                                                                                                                                                                                                                                                                                                                                                                                                                                                                                                                                                                     |  |                                    |                      |       |                                                            |                   |            |                                                                                   |       |             |                                                                                  |       |    |                                                                                 |                        |       |              |                      |             |                             |       |                |                                           |       |    |                          |           |       |                              |                |           |        |       |                        |                          |       |    |                             |             |       |                              |       |             |                                |       |      |                        |       |    |       |        |       |    |         |         |       |    |         |         |       |    |                        |  |       |  |
| <p><b>16.1.</b> Have you seen these medicines before?</p>                                                                                                                                                                                  |                                                                                                                                                                                                                                                                                                                                                                                                                                                                                                                                                                                                                                                                                                                                                                                                                                                                                                                                                                                                                                                                                                                                                                                                                                                                                                     | Yes ..... 1<br>No ..... 0 → [Q 16.4]                                                |                                    |                      |       |                                                            |                   |            |                                                                                   |       |             |                                                                                  |       |    |                                                                                 |                        |       |              |                      |             |                             |       |                |                                           |       |    |                          |           |       |                              |                |           |        |       |                        |                          |       |    |                             |             |       |                              |       |             |                                |       |      |                        |       |    |       |        |       |    |         |         |       |    |         |         |       |    |                        |  |       |  |
| <p><b>16.2.</b> What do you call this medicine?</p>                                                                                                                                                                                        | <table border="0"> <tr><td>Antibiotics</td><td>ທ່ານເຮັດຍານີ້ວ່າອະໄວ</td><td>.....</td><td>16</td></tr> <tr><td>Anti-inflammatory</td><td>ຍານຕ້ອກເສບ</td><td>.....</td><td>17</td></tr> <tr><td>Germ killer</td><td>ຍານຮ່າເຂືອ</td><td>.....</td><td>18</td></tr> <tr><td>Amoxy / Amoxicillin</td><td>ອະມິອກຊີ/ອະມິອກຊີຊີລິນ</td><td>.....</td><td>98</td></tr> <tr><td>Sore throat medicine</td><td>ຍານຕ້ອຈິນຄອ</td><td>.....</td><td>21</td></tr> <tr><td>Cough medicine</td><td>ຍານຕ້ອໄວ</td><td>.....</td><td>17</td></tr> <tr><td>Pain reliever</td><td>ຍານຕ້ອປວດ</td><td>.....</td><td>18</td></tr> <tr><td>Fever reliever</td><td>ຍານຕ້ອໄຫ້</td><td>.....</td><td>98</td></tr> <tr><td>Other (specify: _____)</td><td>ອື່ນໆ (ໄປຮຽນ)</td><td>.....</td><td>21</td></tr> <tr><td>Germ preventer / antibiotic</td><td>ຢາຕ້ານເຊື້ອ</td><td>.....</td><td>22</td></tr> <tr><td>Amok</td><td>ຢາຕ້ານເຊື້ອ</td><td>.....</td><td>23</td></tr> <tr><td>Ampi</td><td>ຢາແອມປີ</td><td>.....</td><td>24</td></tr> <tr><td>Tetra</td><td>ຢາຕາຕາ</td><td>.....</td><td>25</td></tr> <tr><td>Gulolam</td><td>ກູໂລລາມ</td><td>.....</td><td>26</td></tr> <tr><td>Sepasin</td><td>ເສປາສິນ</td><td>.....</td><td>99</td></tr> <tr><td>Other (specify: _____)</td><td></td><td>.....</td><td></td></tr> </table> |                                                                                     | Antibiotics                        | ທ່ານເຮັດຍານີ້ວ່າອະໄວ | ..... | 16                                                         | Anti-inflammatory | ຍານຕ້ອກເສບ | .....                                                                             | 17    | Germ killer | ຍານຮ່າເຂືອ                                                                       | ..... | 18 | Amoxy / Amoxicillin                                                             | ອະມິອກຊີ/ອະມິອກຊີຊີລິນ | ..... | 98           | Sore throat medicine | ຍານຕ້ອຈິນຄອ | .....                       | 21    | Cough medicine | ຍານຕ້ອໄວ                                  | ..... | 17 | Pain reliever            | ຍານຕ້ອປວດ | ..... | 18                           | Fever reliever | ຍານຕ້ອໄຫ້ | .....  | 98    | Other (specify: _____) | ອື່ນໆ (ໄປຮຽນ)            | ..... | 21 | Germ preventer / antibiotic | ຢາຕ້ານເຊື້ອ | ..... | 22                           | Amok  | ຢາຕ້ານເຊື້ອ | .....                          | 23    | Ampi | ຢາແອມປີ                | ..... | 24 | Tetra | ຢາຕາຕາ | ..... | 25 | Gulolam | ກູໂລລາມ | ..... | 26 | Sepasin | ເສປາສິນ | ..... | 99 | Other (specify: _____) |  | ..... |  |
| Antibiotics                                                                                                                                                                                                                                | ທ່ານເຮັດຍານີ້ວ່າອະໄວ                                                                                                                                                                                                                                                                                                                                                                                                                                                                                                                                                                                                                                                                                                                                                                                                                                                                                                                                                                                                                                                                                                                                                                                                                                                                                | .....                                                                               | 16                                 |                      |       |                                                            |                   |            |                                                                                   |       |             |                                                                                  |       |    |                                                                                 |                        |       |              |                      |             |                             |       |                |                                           |       |    |                          |           |       |                              |                |           |        |       |                        |                          |       |    |                             |             |       |                              |       |             |                                |       |      |                        |       |    |       |        |       |    |         |         |       |    |         |         |       |    |                        |  |       |  |
| Anti-inflammatory                                                                                                                                                                                                                          | ຍານຕ້ອກເສບ                                                                                                                                                                                                                                                                                                                                                                                                                                                                                                                                                                                                                                                                                                                                                                                                                                                                                                                                                                                                                                                                                                                                                                                                                                                                                          | .....                                                                               | 17                                 |                      |       |                                                            |                   |            |                                                                                   |       |             |                                                                                  |       |    |                                                                                 |                        |       |              |                      |             |                             |       |                |                                           |       |    |                          |           |       |                              |                |           |        |       |                        |                          |       |    |                             |             |       |                              |       |             |                                |       |      |                        |       |    |       |        |       |    |         |         |       |    |         |         |       |    |                        |  |       |  |
| Germ killer                                                                                                                                                                                                                                | ຍານຮ່າເຂືອ                                                                                                                                                                                                                                                                                                                                                                                                                                                                                                                                                                                                                                                                                                                                                                                                                                                                                                                                                                                                                                                                                                                                                                                                                                                                                          | .....                                                                               | 18                                 |                      |       |                                                            |                   |            |                                                                                   |       |             |                                                                                  |       |    |                                                                                 |                        |       |              |                      |             |                             |       |                |                                           |       |    |                          |           |       |                              |                |           |        |       |                        |                          |       |    |                             |             |       |                              |       |             |                                |       |      |                        |       |    |       |        |       |    |         |         |       |    |         |         |       |    |                        |  |       |  |
| Amoxy / Amoxicillin                                                                                                                                                                                                                        | ອະມິອກຊີ/ອະມິອກຊີຊີລິນ                                                                                                                                                                                                                                                                                                                                                                                                                                                                                                                                                                                                                                                                                                                                                                                                                                                                                                                                                                                                                                                                                                                                                                                                                                                                              | .....                                                                               | 98                                 |                      |       |                                                            |                   |            |                                                                                   |       |             |                                                                                  |       |    |                                                                                 |                        |       |              |                      |             |                             |       |                |                                           |       |    |                          |           |       |                              |                |           |        |       |                        |                          |       |    |                             |             |       |                              |       |             |                                |       |      |                        |       |    |       |        |       |    |         |         |       |    |         |         |       |    |                        |  |       |  |
| Sore throat medicine                                                                                                                                                                                                                       | ຍານຕ້ອຈິນຄອ                                                                                                                                                                                                                                                                                                                                                                                                                                                                                                                                                                                                                                                                                                                                                                                                                                                                                                                                                                                                                                                                                                                                                                                                                                                                                         | .....                                                                               | 21                                 |                      |       |                                                            |                   |            |                                                                                   |       |             |                                                                                  |       |    |                                                                                 |                        |       |              |                      |             |                             |       |                |                                           |       |    |                          |           |       |                              |                |           |        |       |                        |                          |       |    |                             |             |       |                              |       |             |                                |       |      |                        |       |    |       |        |       |    |         |         |       |    |         |         |       |    |                        |  |       |  |
| Cough medicine                                                                                                                                                                                                                             | ຍານຕ້ອໄວ                                                                                                                                                                                                                                                                                                                                                                                                                                                                                                                                                                                                                                                                                                                                                                                                                                                                                                                                                                                                                                                                                                                                                                                                                                                                                            | .....                                                                               | 17                                 |                      |       |                                                            |                   |            |                                                                                   |       |             |                                                                                  |       |    |                                                                                 |                        |       |              |                      |             |                             |       |                |                                           |       |    |                          |           |       |                              |                |           |        |       |                        |                          |       |    |                             |             |       |                              |       |             |                                |       |      |                        |       |    |       |        |       |    |         |         |       |    |         |         |       |    |                        |  |       |  |
| Pain reliever                                                                                                                                                                                                                              | ຍານຕ້ອປວດ                                                                                                                                                                                                                                                                                                                                                                                                                                                                                                                                                                                                                                                                                                                                                                                                                                                                                                                                                                                                                                                                                                                                                                                                                                                                                           | .....                                                                               | 18                                 |                      |       |                                                            |                   |            |                                                                                   |       |             |                                                                                  |       |    |                                                                                 |                        |       |              |                      |             |                             |       |                |                                           |       |    |                          |           |       |                              |                |           |        |       |                        |                          |       |    |                             |             |       |                              |       |             |                                |       |      |                        |       |    |       |        |       |    |         |         |       |    |         |         |       |    |                        |  |       |  |
| Fever reliever                                                                                                                                                                                                                             | ຍານຕ້ອໄຫ້                                                                                                                                                                                                                                                                                                                                                                                                                                                                                                                                                                                                                                                                                                                                                                                                                                                                                                                                                                                                                                                                                                                                                                                                                                                                                           | .....                                                                               | 98                                 |                      |       |                                                            |                   |            |                                                                                   |       |             |                                                                                  |       |    |                                                                                 |                        |       |              |                      |             |                             |       |                |                                           |       |    |                          |           |       |                              |                |           |        |       |                        |                          |       |    |                             |             |       |                              |       |             |                                |       |      |                        |       |    |       |        |       |    |         |         |       |    |         |         |       |    |                        |  |       |  |
| Other (specify: _____)                                                                                                                                                                                                                     | ອື່ນໆ (ໄປຮຽນ)                                                                                                                                                                                                                                                                                                                                                                                                                                                                                                                                                                                                                                                                                                                                                                                                                                                                                                                                                                                                                                                                                                                                                                                                                                                                                       | .....                                                                               | 21                                 |                      |       |                                                            |                   |            |                                                                                   |       |             |                                                                                  |       |    |                                                                                 |                        |       |              |                      |             |                             |       |                |                                           |       |    |                          |           |       |                              |                |           |        |       |                        |                          |       |    |                             |             |       |                              |       |             |                                |       |      |                        |       |    |       |        |       |    |         |         |       |    |         |         |       |    |                        |  |       |  |
| Germ preventer / antibiotic                                                                                                                                                                                                                | ຢາຕ້ານເຊື້ອ                                                                                                                                                                                                                                                                                                                                                                                                                                                                                                                                                                                                                                                                                                                                                                                                                                                                                                                                                                                                                                                                                                                                                                                                                                                                                         | .....                                                                               | 22                                 |                      |       |                                                            |                   |            |                                                                                   |       |             |                                                                                  |       |    |                                                                                 |                        |       |              |                      |             |                             |       |                |                                           |       |    |                          |           |       |                              |                |           |        |       |                        |                          |       |    |                             |             |       |                              |       |             |                                |       |      |                        |       |    |       |        |       |    |         |         |       |    |         |         |       |    |                        |  |       |  |
| Amok                                                                                                                                                                                                                                       | ຢາຕ້ານເຊື້ອ                                                                                                                                                                                                                                                                                                                                                                                                                                                                                                                                                                                                                                                                                                                                                                                                                                                                                                                                                                                                                                                                                                                                                                                                                                                                                         | .....                                                                               | 23                                 |                      |       |                                                            |                   |            |                                                                                   |       |             |                                                                                  |       |    |                                                                                 |                        |       |              |                      |             |                             |       |                |                                           |       |    |                          |           |       |                              |                |           |        |       |                        |                          |       |    |                             |             |       |                              |       |             |                                |       |      |                        |       |    |       |        |       |    |         |         |       |    |         |         |       |    |                        |  |       |  |
| Ampi                                                                                                                                                                                                                                       | ຢາແອມປີ                                                                                                                                                                                                                                                                                                                                                                                                                                                                                                                                                                                                                                                                                                                                                                                                                                                                                                                                                                                                                                                                                                                                                                                                                                                                                             | .....                                                                               | 24                                 |                      |       |                                                            |                   |            |                                                                                   |       |             |                                                                                  |       |    |                                                                                 |                        |       |              |                      |             |                             |       |                |                                           |       |    |                          |           |       |                              |                |           |        |       |                        |                          |       |    |                             |             |       |                              |       |             |                                |       |      |                        |       |    |       |        |       |    |         |         |       |    |         |         |       |    |                        |  |       |  |
| Tetra                                                                                                                                                                                                                                      | ຢາຕາຕາ                                                                                                                                                                                                                                                                                                                                                                                                                                                                                                                                                                                                                                                                                                                                                                                                                                                                                                                                                                                                                                                                                                                                                                                                                                                                                              | .....                                                                               | 25                                 |                      |       |                                                            |                   |            |                                                                                   |       |             |                                                                                  |       |    |                                                                                 |                        |       |              |                      |             |                             |       |                |                                           |       |    |                          |           |       |                              |                |           |        |       |                        |                          |       |    |                             |             |       |                              |       |             |                                |       |      |                        |       |    |       |        |       |    |         |         |       |    |         |         |       |    |                        |  |       |  |
| Gulolam                                                                                                                                                                                                                                    | ກູໂລລາມ                                                                                                                                                                                                                                                                                                                                                                                                                                                                                                                                                                                                                                                                                                                                                                                                                                                                                                                                                                                                                                                                                                                                                                                                                                                                                             | .....                                                                               | 26                                 |                      |       |                                                            |                   |            |                                                                                   |       |             |                                                                                  |       |    |                                                                                 |                        |       |              |                      |             |                             |       |                |                                           |       |    |                          |           |       |                              |                |           |        |       |                        |                          |       |    |                             |             |       |                              |       |             |                                |       |      |                        |       |    |       |        |       |    |         |         |       |    |         |         |       |    |                        |  |       |  |
| Sepasin                                                                                                                                                                                                                                    | ເສປາສິນ                                                                                                                                                                                                                                                                                                                                                                                                                                                                                                                                                                                                                                                                                                                                                                                                                                                                                                                                                                                                                                                                                                                                                                                                                                                                                             | .....                                                                               | 99                                 |                      |       |                                                            |                   |            |                                                                                   |       |             |                                                                                  |       |    |                                                                                 |                        |       |              |                      |             |                             |       |                |                                           |       |    |                          |           |       |                              |                |           |        |       |                        |                          |       |    |                             |             |       |                              |       |             |                                |       |      |                        |       |    |       |        |       |    |         |         |       |    |         |         |       |    |                        |  |       |  |
| Other (specify: _____)                                                                                                                                                                                                                     |                                                                                                                                                                                                                                                                                                                                                                                                                                                                                                                                                                                                                                                                                                                                                                                                                                                                                                                                                                                                                                                                                                                                                                                                                                                                                                     | .....                                                                               |                                    |                      |       |                                                            |                   |            |                                                                                   |       |             |                                                                                  |       |    |                                                                                 |                        |       |              |                      |             |                             |       |                |                                           |       |    |                          |           |       |                              |                |           |        |       |                        |                          |       |    |                             |             |       |                              |       |             |                                |       |      |                        |       |    |       |        |       |    |         |         |       |    |         |         |       |    |                        |  |       |  |
| <p><b>16.3.</b> What symptoms or illnesses would you use this medicine for?</p>                                                                                                                                                            | <table border="0"> <tr><td>Fever</td><td>.....</td><td>1</td></tr> <tr><td>Cough</td><td>.....</td><td>2</td></tr> <tr><td>Sore throat</td><td>.....</td><td>3</td></tr> <tr><td>Inflammation</td><td>.....</td><td>4</td></tr> <tr><td>Cold, flu, runny nose</td><td>.....</td><td>5</td></tr> <tr><td>Diarrhoea</td><td>.....</td><td>6</td></tr> <tr><td>Headache</td><td>.....</td><td>7</td></tr> <tr><td>Stomach ache</td><td>.....</td><td>8</td></tr> <tr><td>Muscle pain, other aches</td><td>.....</td><td>9</td></tr> <tr><td>Skin diseases, rashes, lumps</td><td>.....</td><td>10</td></tr> <tr><td>Wounds</td><td>.....</td><td>11</td></tr> <tr><td>Urinary tract infections</td><td>.....</td><td>12</td></tr> <tr><td>Every kind of sickness</td><td>.....</td><td>13</td></tr> <tr><td>Whatever the doctor suggests</td><td>.....</td><td>14</td></tr> <tr><td>Don't know / prefer not to say</td><td>.....</td><td>98</td></tr> <tr><td>Other (specify: _____)</td><td>.....</td><td>99</td></tr> </table>                                                                                                                                                                                                                                                                       |                                                                                     | Fever                              | .....                | 1     | Cough                                                      | .....             | 2          | Sore throat                                                                       | ..... | 3           | Inflammation                                                                     | ..... | 4  | Cold, flu, runny nose                                                           | .....                  | 5     | Diarrhoea    | .....                | 6           | Headache                    | ..... | 7              | Stomach ache                              | ..... | 8  | Muscle pain, other aches | .....     | 9     | Skin diseases, rashes, lumps | .....          | 10        | Wounds | ..... | 11                     | Urinary tract infections | ..... | 12 | Every kind of sickness      | .....       | 13    | Whatever the doctor suggests | ..... | 14          | Don't know / prefer not to say | ..... | 98   | Other (specify: _____) | ..... | 99 |       |        |       |    |         |         |       |    |         |         |       |    |                        |  |       |  |
| Fever                                                                                                                                                                                                                                      | .....                                                                                                                                                                                                                                                                                                                                                                                                                                                                                                                                                                                                                                                                                                                                                                                                                                                                                                                                                                                                                                                                                                                                                                                                                                                                                               | 1                                                                                   |                                    |                      |       |                                                            |                   |            |                                                                                   |       |             |                                                                                  |       |    |                                                                                 |                        |       |              |                      |             |                             |       |                |                                           |       |    |                          |           |       |                              |                |           |        |       |                        |                          |       |    |                             |             |       |                              |       |             |                                |       |      |                        |       |    |       |        |       |    |         |         |       |    |         |         |       |    |                        |  |       |  |
| Cough                                                                                                                                                                                                                                      | .....                                                                                                                                                                                                                                                                                                                                                                                                                                                                                                                                                                                                                                                                                                                                                                                                                                                                                                                                                                                                                                                                                                                                                                                                                                                                                               | 2                                                                                   |                                    |                      |       |                                                            |                   |            |                                                                                   |       |             |                                                                                  |       |    |                                                                                 |                        |       |              |                      |             |                             |       |                |                                           |       |    |                          |           |       |                              |                |           |        |       |                        |                          |       |    |                             |             |       |                              |       |             |                                |       |      |                        |       |    |       |        |       |    |         |         |       |    |         |         |       |    |                        |  |       |  |
| Sore throat                                                                                                                                                                                                                                | .....                                                                                                                                                                                                                                                                                                                                                                                                                                                                                                                                                                                                                                                                                                                                                                                                                                                                                                                                                                                                                                                                                                                                                                                                                                                                                               | 3                                                                                   |                                    |                      |       |                                                            |                   |            |                                                                                   |       |             |                                                                                  |       |    |                                                                                 |                        |       |              |                      |             |                             |       |                |                                           |       |    |                          |           |       |                              |                |           |        |       |                        |                          |       |    |                             |             |       |                              |       |             |                                |       |      |                        |       |    |       |        |       |    |         |         |       |    |         |         |       |    |                        |  |       |  |
| Inflammation                                                                                                                                                                                                                               | .....                                                                                                                                                                                                                                                                                                                                                                                                                                                                                                                                                                                                                                                                                                                                                                                                                                                                                                                                                                                                                                                                                                                                                                                                                                                                                               | 4                                                                                   |                                    |                      |       |                                                            |                   |            |                                                                                   |       |             |                                                                                  |       |    |                                                                                 |                        |       |              |                      |             |                             |       |                |                                           |       |    |                          |           |       |                              |                |           |        |       |                        |                          |       |    |                             |             |       |                              |       |             |                                |       |      |                        |       |    |       |        |       |    |         |         |       |    |         |         |       |    |                        |  |       |  |
| Cold, flu, runny nose                                                                                                                                                                                                                      | .....                                                                                                                                                                                                                                                                                                                                                                                                                                                                                                                                                                                                                                                                                                                                                                                                                                                                                                                                                                                                                                                                                                                                                                                                                                                                                               | 5                                                                                   |                                    |                      |       |                                                            |                   |            |                                                                                   |       |             |                                                                                  |       |    |                                                                                 |                        |       |              |                      |             |                             |       |                |                                           |       |    |                          |           |       |                              |                |           |        |       |                        |                          |       |    |                             |             |       |                              |       |             |                                |       |      |                        |       |    |       |        |       |    |         |         |       |    |         |         |       |    |                        |  |       |  |
| Diarrhoea                                                                                                                                                                                                                                  | .....                                                                                                                                                                                                                                                                                                                                                                                                                                                                                                                                                                                                                                                                                                                                                                                                                                                                                                                                                                                                                                                                                                                                                                                                                                                                                               | 6                                                                                   |                                    |                      |       |                                                            |                   |            |                                                                                   |       |             |                                                                                  |       |    |                                                                                 |                        |       |              |                      |             |                             |       |                |                                           |       |    |                          |           |       |                              |                |           |        |       |                        |                          |       |    |                             |             |       |                              |       |             |                                |       |      |                        |       |    |       |        |       |    |         |         |       |    |         |         |       |    |                        |  |       |  |
| Headache                                                                                                                                                                                                                                   | .....                                                                                                                                                                                                                                                                                                                                                                                                                                                                                                                                                                                                                                                                                                                                                                                                                                                                                                                                                                                                                                                                                                                                                                                                                                                                                               | 7                                                                                   |                                    |                      |       |                                                            |                   |            |                                                                                   |       |             |                                                                                  |       |    |                                                                                 |                        |       |              |                      |             |                             |       |                |                                           |       |    |                          |           |       |                              |                |           |        |       |                        |                          |       |    |                             |             |       |                              |       |             |                                |       |      |                        |       |    |       |        |       |    |         |         |       |    |         |         |       |    |                        |  |       |  |
| Stomach ache                                                                                                                                                                                                                               | .....                                                                                                                                                                                                                                                                                                                                                                                                                                                                                                                                                                                                                                                                                                                                                                                                                                                                                                                                                                                                                                                                                                                                                                                                                                                                                               | 8                                                                                   |                                    |                      |       |                                                            |                   |            |                                                                                   |       |             |                                                                                  |       |    |                                                                                 |                        |       |              |                      |             |                             |       |                |                                           |       |    |                          |           |       |                              |                |           |        |       |                        |                          |       |    |                             |             |       |                              |       |             |                                |       |      |                        |       |    |       |        |       |    |         |         |       |    |         |         |       |    |                        |  |       |  |
| Muscle pain, other aches                                                                                                                                                                                                                   | .....                                                                                                                                                                                                                                                                                                                                                                                                                                                                                                                                                                                                                                                                                                                                                                                                                                                                                                                                                                                                                                                                                                                                                                                                                                                                                               | 9                                                                                   |                                    |                      |       |                                                            |                   |            |                                                                                   |       |             |                                                                                  |       |    |                                                                                 |                        |       |              |                      |             |                             |       |                |                                           |       |    |                          |           |       |                              |                |           |        |       |                        |                          |       |    |                             |             |       |                              |       |             |                                |       |      |                        |       |    |       |        |       |    |         |         |       |    |         |         |       |    |                        |  |       |  |
| Skin diseases, rashes, lumps                                                                                                                                                                                                               | .....                                                                                                                                                                                                                                                                                                                                                                                                                                                                                                                                                                                                                                                                                                                                                                                                                                                                                                                                                                                                                                                                                                                                                                                                                                                                                               | 10                                                                                  |                                    |                      |       |                                                            |                   |            |                                                                                   |       |             |                                                                                  |       |    |                                                                                 |                        |       |              |                      |             |                             |       |                |                                           |       |    |                          |           |       |                              |                |           |        |       |                        |                          |       |    |                             |             |       |                              |       |             |                                |       |      |                        |       |    |       |        |       |    |         |         |       |    |         |         |       |    |                        |  |       |  |
| Wounds                                                                                                                                                                                                                                     | .....                                                                                                                                                                                                                                                                                                                                                                                                                                                                                                                                                                                                                                                                                                                                                                                                                                                                                                                                                                                                                                                                                                                                                                                                                                                                                               | 11                                                                                  |                                    |                      |       |                                                            |                   |            |                                                                                   |       |             |                                                                                  |       |    |                                                                                 |                        |       |              |                      |             |                             |       |                |                                           |       |    |                          |           |       |                              |                |           |        |       |                        |                          |       |    |                             |             |       |                              |       |             |                                |       |      |                        |       |    |       |        |       |    |         |         |       |    |         |         |       |    |                        |  |       |  |
| Urinary tract infections                                                                                                                                                                                                                   | .....                                                                                                                                                                                                                                                                                                                                                                                                                                                                                                                                                                                                                                                                                                                                                                                                                                                                                                                                                                                                                                                                                                                                                                                                                                                                                               | 12                                                                                  |                                    |                      |       |                                                            |                   |            |                                                                                   |       |             |                                                                                  |       |    |                                                                                 |                        |       |              |                      |             |                             |       |                |                                           |       |    |                          |           |       |                              |                |           |        |       |                        |                          |       |    |                             |             |       |                              |       |             |                                |       |      |                        |       |    |       |        |       |    |         |         |       |    |         |         |       |    |                        |  |       |  |
| Every kind of sickness                                                                                                                                                                                                                     | .....                                                                                                                                                                                                                                                                                                                                                                                                                                                                                                                                                                                                                                                                                                                                                                                                                                                                                                                                                                                                                                                                                                                                                                                                                                                                                               | 13                                                                                  |                                    |                      |       |                                                            |                   |            |                                                                                   |       |             |                                                                                  |       |    |                                                                                 |                        |       |              |                      |             |                             |       |                |                                           |       |    |                          |           |       |                              |                |           |        |       |                        |                          |       |    |                             |             |       |                              |       |             |                                |       |      |                        |       |    |       |        |       |    |         |         |       |    |         |         |       |    |                        |  |       |  |
| Whatever the doctor suggests                                                                                                                                                                                                               | .....                                                                                                                                                                                                                                                                                                                                                                                                                                                                                                                                                                                                                                                                                                                                                                                                                                                                                                                                                                                                                                                                                                                                                                                                                                                                                               | 14                                                                                  |                                    |                      |       |                                                            |                   |            |                                                                                   |       |             |                                                                                  |       |    |                                                                                 |                        |       |              |                      |             |                             |       |                |                                           |       |    |                          |           |       |                              |                |           |        |       |                        |                          |       |    |                             |             |       |                              |       |             |                                |       |      |                        |       |    |       |        |       |    |         |         |       |    |         |         |       |    |                        |  |       |  |
| Don't know / prefer not to say                                                                                                                                                                                                             | .....                                                                                                                                                                                                                                                                                                                                                                                                                                                                                                                                                                                                                                                                                                                                                                                                                                                                                                                                                                                                                                                                                                                                                                                                                                                                                               | 98                                                                                  |                                    |                      |       |                                                            |                   |            |                                                                                   |       |             |                                                                                  |       |    |                                                                                 |                        |       |              |                      |             |                             |       |                |                                           |       |    |                          |           |       |                              |                |           |        |       |                        |                          |       |    |                             |             |       |                              |       |             |                                |       |      |                        |       |    |       |        |       |    |         |         |       |    |         |         |       |    |                        |  |       |  |
| Other (specify: _____)                                                                                                                                                                                                                     | .....                                                                                                                                                                                                                                                                                                                                                                                                                                                                                                                                                                                                                                                                                                                                                                                                                                                                                                                                                                                                                                                                                                                                                                                                                                                                                               | 99                                                                                  |                                    |                      |       |                                                            |                   |            |                                                                                   |       |             |                                                                                  |       |    |                                                                                 |                        |       |              |                      |             |                             |       |                |                                           |       |    |                          |           |       |                              |                |           |        |       |                        |                          |       |    |                             |             |       |                              |       |             |                                |       |      |                        |       |    |       |        |       |    |         |         |       |    |         |         |       |    |                        |  |       |  |
| <p><b>16.4.</b> Is there any situation for which you would buy this medicine?</p>                                                                                                                                                          | <table border="0"> <tr><td>Desirable attitude/knowledge</td><td>.....</td><td>1</td></tr> <tr><td>Undesirable attitude/knowledge</td><td>.....</td><td>0</td></tr> <tr><td>No attitude / refuse to answer (respondent is aware, but doesn't reveal attitude)</td><td>.....</td><td>97</td></tr> <tr><td>Answer does not apply to question (respondent may be aware/unaware; satisficing)</td><td>.....</td><td>98</td></tr> <tr><td>Not aware of this medicine (awkward, cannot answer but does not try to satisfy)</td><td>.....</td><td>99</td></tr> </table>                                                                                                                                                                                                                                                                                                                                                                                                                                                                                                                                                                                                                                                                                                                                     |                                                                                     | Desirable attitude/knowledge       | .....                | 1     | Undesirable attitude/knowledge                             | .....             | 0          | No attitude / refuse to answer (respondent is aware, but doesn't reveal attitude) | ..... | 97          | Answer does not apply to question (respondent may be aware/unaware; satisficing) | ..... | 98 | Not aware of this medicine (awkward, cannot answer but does not try to satisfy) | .....                  | 99    |              |                      |             |                             |       |                |                                           |       |    |                          |           |       |                              |                |           |        |       |                        |                          |       |    |                             |             |       |                              |       |             |                                |       |      |                        |       |    |       |        |       |    |         |         |       |    |         |         |       |    |                        |  |       |  |
| Desirable attitude/knowledge                                                                                                                                                                                                               | .....                                                                                                                                                                                                                                                                                                                                                                                                                                                                                                                                                                                                                                                                                                                                                                                                                                                                                                                                                                                                                                                                                                                                                                                                                                                                                               | 1                                                                                   |                                    |                      |       |                                                            |                   |            |                                                                                   |       |             |                                                                                  |       |    |                                                                                 |                        |       |              |                      |             |                             |       |                |                                           |       |    |                          |           |       |                              |                |           |        |       |                        |                          |       |    |                             |             |       |                              |       |             |                                |       |      |                        |       |    |       |        |       |    |         |         |       |    |         |         |       |    |                        |  |       |  |
| Undesirable attitude/knowledge                                                                                                                                                                                                             | .....                                                                                                                                                                                                                                                                                                                                                                                                                                                                                                                                                                                                                                                                                                                                                                                                                                                                                                                                                                                                                                                                                                                                                                                                                                                                                               | 0                                                                                   |                                    |                      |       |                                                            |                   |            |                                                                                   |       |             |                                                                                  |       |    |                                                                                 |                        |       |              |                      |             |                             |       |                |                                           |       |    |                          |           |       |                              |                |           |        |       |                        |                          |       |    |                             |             |       |                              |       |             |                                |       |      |                        |       |    |       |        |       |    |         |         |       |    |         |         |       |    |                        |  |       |  |
| No attitude / refuse to answer (respondent is aware, but doesn't reveal attitude)                                                                                                                                                          | .....                                                                                                                                                                                                                                                                                                                                                                                                                                                                                                                                                                                                                                                                                                                                                                                                                                                                                                                                                                                                                                                                                                                                                                                                                                                                                               | 97                                                                                  |                                    |                      |       |                                                            |                   |            |                                                                                   |       |             |                                                                                  |       |    |                                                                                 |                        |       |              |                      |             |                             |       |                |                                           |       |    |                          |           |       |                              |                |           |        |       |                        |                          |       |    |                             |             |       |                              |       |             |                                |       |      |                        |       |    |       |        |       |    |         |         |       |    |         |         |       |    |                        |  |       |  |
| Answer does not apply to question (respondent may be aware/unaware; satisficing)                                                                                                                                                           | .....                                                                                                                                                                                                                                                                                                                                                                                                                                                                                                                                                                                                                                                                                                                                                                                                                                                                                                                                                                                                                                                                                                                                                                                                                                                                                               | 98                                                                                  |                                    |                      |       |                                                            |                   |            |                                                                                   |       |             |                                                                                  |       |    |                                                                                 |                        |       |              |                      |             |                             |       |                |                                           |       |    |                          |           |       |                              |                |           |        |       |                        |                          |       |    |                             |             |       |                              |       |             |                                |       |      |                        |       |    |       |        |       |    |         |         |       |    |         |         |       |    |                        |  |       |  |
| Not aware of this medicine (awkward, cannot answer but does not try to satisfy)                                                                                                                                                            | .....                                                                                                                                                                                                                                                                                                                                                                                                                                                                                                                                                                                                                                                                                                                                                                                                                                                                                                                                                                                                                                                                                                                                                                                                                                                                                               | 99                                                                                  |                                    |                      |       |                                                            |                   |            |                                                                                   |       |             |                                                                                  |       |    |                                                                                 |                        |       |              |                      |             |                             |       |                |                                           |       |    |                          |           |       |                              |                |           |        |       |                        |                          |       |    |                             |             |       |                              |       |             |                                |       |      |                        |       |    |       |        |       |    |         |         |       |    |         |         |       |    |                        |  |       |  |
| <p><b>16.5.</b> Do you prefer other remedies such as herbs or cough syrup to this medicine for [sore throat]?</p>                                                                                                                          | <table border="0"> <tr><td>Desirable attitude/knowledge</td><td>.....</td><td>1</td></tr> <tr><td>Undesirable attitude/knowledge</td><td>.....</td><td>0</td></tr> <tr><td>No attitude / refuse to answer (respondent is aware, but doesn't reveal attitude)</td><td>.....</td><td>97</td></tr> <tr><td>Answer does not apply to question (respondent may be aware/unaware; satisficing)</td><td>.....</td><td>98</td></tr> <tr><td>Not aware of this medicine (awkward, cannot answer but does not try to satisfy)</td><td>.....</td><td>99</td></tr> </table>                                                                                                                                                                                                                                                                                                                                                                                                                                                                                                                                                                                                                                                                                                                                     |                                                                                     | Desirable attitude/knowledge       | .....                | 1     | Undesirable attitude/knowledge                             | .....             | 0          | No attitude / refuse to answer (respondent is aware, but doesn't reveal attitude) | ..... | 97          | Answer does not apply to question (respondent may be aware/unaware; satisficing) | ..... | 98 | Not aware of this medicine (awkward, cannot answer but does not try to satisfy) | .....                  | 99    |              |                      |             |                             |       |                |                                           |       |    |                          |           |       |                              |                |           |        |       |                        |                          |       |    |                             |             |       |                              |       |             |                                |       |      |                        |       |    |       |        |       |    |         |         |       |    |         |         |       |    |                        |  |       |  |
| Desirable attitude/knowledge                                                                                                                                                                                                               | .....                                                                                                                                                                                                                                                                                                                                                                                                                                                                                                                                                                                                                                                                                                                                                                                                                                                                                                                                                                                                                                                                                                                                                                                                                                                                                               | 1                                                                                   |                                    |                      |       |                                                            |                   |            |                                                                                   |       |             |                                                                                  |       |    |                                                                                 |                        |       |              |                      |             |                             |       |                |                                           |       |    |                          |           |       |                              |                |           |        |       |                        |                          |       |    |                             |             |       |                              |       |             |                                |       |      |                        |       |    |       |        |       |    |         |         |       |    |         |         |       |    |                        |  |       |  |
| Undesirable attitude/knowledge                                                                                                                                                                                                             | .....                                                                                                                                                                                                                                                                                                                                                                                                                                                                                                                                                                                                                                                                                                                                                                                                                                                                                                                                                                                                                                                                                                                                                                                                                                                                                               | 0                                                                                   |                                    |                      |       |                                                            |                   |            |                                                                                   |       |             |                                                                                  |       |    |                                                                                 |                        |       |              |                      |             |                             |       |                |                                           |       |    |                          |           |       |                              |                |           |        |       |                        |                          |       |    |                             |             |       |                              |       |             |                                |       |      |                        |       |    |       |        |       |    |         |         |       |    |         |         |       |    |                        |  |       |  |
| No attitude / refuse to answer (respondent is aware, but doesn't reveal attitude)                                                                                                                                                          | .....                                                                                                                                                                                                                                                                                                                                                                                                                                                                                                                                                                                                                                                                                                                                                                                                                                                                                                                                                                                                                                                                                                                                                                                                                                                                                               | 97                                                                                  |                                    |                      |       |                                                            |                   |            |                                                                                   |       |             |                                                                                  |       |    |                                                                                 |                        |       |              |                      |             |                             |       |                |                                           |       |    |                          |           |       |                              |                |           |        |       |                        |                          |       |    |                             |             |       |                              |       |             |                                |       |      |                        |       |    |       |        |       |    |         |         |       |    |         |         |       |    |                        |  |       |  |
| Answer does not apply to question (respondent may be aware/unaware; satisficing)                                                                                                                                                           | .....                                                                                                                                                                                                                                                                                                                                                                                                                                                                                                                                                                                                                                                                                                                                                                                                                                                                                                                                                                                                                                                                                                                                                                                                                                                                                               | 98                                                                                  |                                    |                      |       |                                                            |                   |            |                                                                                   |       |             |                                                                                  |       |    |                                                                                 |                        |       |              |                      |             |                             |       |                |                                           |       |    |                          |           |       |                              |                |           |        |       |                        |                          |       |    |                             |             |       |                              |       |             |                                |       |      |                        |       |    |       |        |       |    |         |         |       |    |         |         |       |    |                        |  |       |  |
| Not aware of this medicine (awkward, cannot answer but does not try to satisfy)                                                                                                                                                            | .....                                                                                                                                                                                                                                                                                                                                                                                                                                                                                                                                                                                                                                                                                                                                                                                                                                                                                                                                                                                                                                                                                                                                                                                                                                                                                               | 99                                                                                  |                                    |                      |       |                                                            |                   |            |                                                                                   |       |             |                                                                                  |       |    |                                                                                 |                        |       |              |                      |             |                             |       |                |                                           |       |    |                          |           |       |                              |                |           |        |       |                        |                          |       |    |                             |             |       |                              |       |             |                                |       |      |                        |       |    |       |        |       |    |         |         |       |    |         |         |       |    |                        |  |       |  |
| <p><b>16.6.</b> If you were prescribed this medicine by a doctor and did not finish the course, would you keep it for future use?</p>                                                                                                      | <table border="0"> <tr><td>Desirable attitude/knowledge</td><td>.....</td><td>1</td></tr> <tr><td>Undesirable attitude/knowledge</td><td>.....</td><td>0</td></tr> <tr><td>No attitude / refuse to answer (respondent is aware, but doesn't reveal attitude)</td><td>.....</td><td>97</td></tr> <tr><td>Answer does not apply to question (respondent may be aware/unaware; satisficing)</td><td>.....</td><td>98</td></tr> <tr><td>Not aware of this medicine (awkward, cannot answer but does not try to satisfy)</td><td>.....</td><td>99</td></tr> </table>                                                                                                                                                                                                                                                                                                                                                                                                                                                                                                                                                                                                                                                                                                                                     |                                                                                     | Desirable attitude/knowledge       | .....                | 1     | Undesirable attitude/knowledge                             | .....             | 0          | No attitude / refuse to answer (respondent is aware, but doesn't reveal attitude) | ..... | 97          | Answer does not apply to question (respondent may be aware/unaware; satisficing) | ..... | 98 | Not aware of this medicine (awkward, cannot answer but does not try to satisfy) | .....                  | 99    |              |                      |             |                             |       |                |                                           |       |    |                          |           |       |                              |                |           |        |       |                        |                          |       |    |                             |             |       |                              |       |             |                                |       |      |                        |       |    |       |        |       |    |         |         |       |    |         |         |       |    |                        |  |       |  |
| Desirable attitude/knowledge                                                                                                                                                                                                               | .....                                                                                                                                                                                                                                                                                                                                                                                                                                                                                                                                                                                                                                                                                                                                                                                                                                                                                                                                                                                                                                                                                                                                                                                                                                                                                               | 1                                                                                   |                                    |                      |       |                                                            |                   |            |                                                                                   |       |             |                                                                                  |       |    |                                                                                 |                        |       |              |                      |             |                             |       |                |                                           |       |    |                          |           |       |                              |                |           |        |       |                        |                          |       |    |                             |             |       |                              |       |             |                                |       |      |                        |       |    |       |        |       |    |         |         |       |    |         |         |       |    |                        |  |       |  |
| Undesirable attitude/knowledge                                                                                                                                                                                                             | .....                                                                                                                                                                                                                                                                                                                                                                                                                                                                                                                                                                                                                                                                                                                                                                                                                                                                                                                                                                                                                                                                                                                                                                                                                                                                                               | 0                                                                                   |                                    |                      |       |                                                            |                   |            |                                                                                   |       |             |                                                                                  |       |    |                                                                                 |                        |       |              |                      |             |                             |       |                |                                           |       |    |                          |           |       |                              |                |           |        |       |                        |                          |       |    |                             |             |       |                              |       |             |                                |       |      |                        |       |    |       |        |       |    |         |         |       |    |         |         |       |    |                        |  |       |  |
| No attitude / refuse to answer (respondent is aware, but doesn't reveal attitude)                                                                                                                                                          | .....                                                                                                                                                                                                                                                                                                                                                                                                                                                                                                                                                                                                                                                                                                                                                                                                                                                                                                                                                                                                                                                                                                                                                                                                                                                                                               | 97                                                                                  |                                    |                      |       |                                                            |                   |            |                                                                                   |       |             |                                                                                  |       |    |                                                                                 |                        |       |              |                      |             |                             |       |                |                                           |       |    |                          |           |       |                              |                |           |        |       |                        |                          |       |    |                             |             |       |                              |       |             |                                |       |      |                        |       |    |       |        |       |    |         |         |       |    |         |         |       |    |                        |  |       |  |
| Answer does not apply to question (respondent may be aware/unaware; satisficing)                                                                                                                                                           | .....                                                                                                                                                                                                                                                                                                                                                                                                                                                                                                                                                                                                                                                                                                                                                                                                                                                                                                                                                                                                                                                                                                                                                                                                                                                                                               | 98                                                                                  |                                    |                      |       |                                                            |                   |            |                                                                                   |       |             |                                                                                  |       |    |                                                                                 |                        |       |              |                      |             |                             |       |                |                                           |       |    |                          |           |       |                              |                |           |        |       |                        |                          |       |    |                             |             |       |                              |       |             |                                |       |      |                        |       |    |       |        |       |    |         |         |       |    |         |         |       |    |                        |  |       |  |
| Not aware of this medicine (awkward, cannot answer but does not try to satisfy)                                                                                                                                                            | .....                                                                                                                                                                                                                                                                                                                                                                                                                                                                                                                                                                                                                                                                                                                                                                                                                                                                                                                                                                                                                                                                                                                                                                                                                                                                                               | 99                                                                                  |                                    |                      |       |                                                            |                   |            |                                                                                   |       |             |                                                                                  |       |    |                                                                                 |                        |       |              |                      |             |                             |       |                |                                           |       |    |                          |           |       |                              |                |           |        |       |                        |                          |       |    |                             |             |       |                              |       |             |                                |       |      |                        |       |    |       |        |       |    |         |         |       |    |         |         |       |    |                        |  |       |  |
| <p><b>16.7.</b> Have you heard about drug resistance?<br/>                 (16.7a using alternative term "lueng yah" in Lao)</p>                                                                                                           | Yes ..... 1<br>No ..... 2                                                                                                                                                                                                                                                                                                                                                                                                                                                                                                                                                                                                                                                                                                                                                                                                                                                                                                                                                                                                                                                                                                                                                                                                                                                                           |                                                                                     |                                    |                      |       |                                                            |                   |            |                                                                                   |       |             |                                                                                  |       |    |                                                                                 |                        |       |              |                      |             |                             |       |                |                                           |       |    |                          |           |       |                              |                |           |        |       |                        |                          |       |    |                             |             |       |                              |       |             |                                |       |      |                        |       |    |       |        |       |    |         |         |       |    |         |         |       |    |                        |  |       |  |
| <p><b>16.8.</b> What do you think is drug resistance?<br/>                 (16.8a using alternative term "lueng yah" in Lao)</p>                                                                                                           | <table border="0"> <tr><td>Bacteria are resistant to medicine</td><td>.....</td><td>1</td></tr> <tr><td>Antibiotics become less effective if used wrongly/too much</td><td>.....</td><td>2</td></tr> <tr><td>Medicine in general becomes less effective if used wrongly/too much</td><td>.....</td><td>3</td></tr> <tr><td>Being stubborn to take medicine</td><td>.....</td><td>4</td></tr> <tr><td>Being addicted to medicine</td><td>.....</td><td>5</td></tr> <tr><td>Drug allergy</td><td>.....</td><td>6</td></tr> <tr><td>Lueng yah (drug resistance)</td><td>.....</td><td>7</td></tr> <tr><td>Answer does not relate to drug resistance</td><td>.....</td><td>8</td></tr> <tr><td>Other (specify)</td><td>.....</td><td>98</td></tr> <tr><td>"Don't know"</td><td>.....</td><td>99</td></tr> </table>                                                                                                                                                                                                                                                                                                                                                                                                                                                                                      |                                                                                     | Bacteria are resistant to medicine | .....                | 1     | Antibiotics become less effective if used wrongly/too much | .....             | 2          | Medicine in general becomes less effective if used wrongly/too much               | ..... | 3           | Being stubborn to take medicine                                                  | ..... | 4  | Being addicted to medicine                                                      | .....                  | 5     | Drug allergy | .....                | 6           | Lueng yah (drug resistance) | ..... | 7              | Answer does not relate to drug resistance | ..... | 8  | Other (specify)          | .....     | 98    | "Don't know"                 | .....          | 99        |        |       |                        |                          |       |    |                             |             |       |                              |       |             |                                |       |      |                        |       |    |       |        |       |    |         |         |       |    |         |         |       |    |                        |  |       |  |
| Bacteria are resistant to medicine                                                                                                                                                                                                         | .....                                                                                                                                                                                                                                                                                                                                                                                                                                                                                                                                                                                                                                                                                                                                                                                                                                                                                                                                                                                                                                                                                                                                                                                                                                                                                               | 1                                                                                   |                                    |                      |       |                                                            |                   |            |                                                                                   |       |             |                                                                                  |       |    |                                                                                 |                        |       |              |                      |             |                             |       |                |                                           |       |    |                          |           |       |                              |                |           |        |       |                        |                          |       |    |                             |             |       |                              |       |             |                                |       |      |                        |       |    |       |        |       |    |         |         |       |    |         |         |       |    |                        |  |       |  |
| Antibiotics become less effective if used wrongly/too much                                                                                                                                                                                 | .....                                                                                                                                                                                                                                                                                                                                                                                                                                                                                                                                                                                                                                                                                                                                                                                                                                                                                                                                                                                                                                                                                                                                                                                                                                                                                               | 2                                                                                   |                                    |                      |       |                                                            |                   |            |                                                                                   |       |             |                                                                                  |       |    |                                                                                 |                        |       |              |                      |             |                             |       |                |                                           |       |    |                          |           |       |                              |                |           |        |       |                        |                          |       |    |                             |             |       |                              |       |             |                                |       |      |                        |       |    |       |        |       |    |         |         |       |    |         |         |       |    |                        |  |       |  |
| Medicine in general becomes less effective if used wrongly/too much                                                                                                                                                                        | .....                                                                                                                                                                                                                                                                                                                                                                                                                                                                                                                                                                                                                                                                                                                                                                                                                                                                                                                                                                                                                                                                                                                                                                                                                                                                                               | 3                                                                                   |                                    |                      |       |                                                            |                   |            |                                                                                   |       |             |                                                                                  |       |    |                                                                                 |                        |       |              |                      |             |                             |       |                |                                           |       |    |                          |           |       |                              |                |           |        |       |                        |                          |       |    |                             |             |       |                              |       |             |                                |       |      |                        |       |    |       |        |       |    |         |         |       |    |         |         |       |    |                        |  |       |  |
| Being stubborn to take medicine                                                                                                                                                                                                            | .....                                                                                                                                                                                                                                                                                                                                                                                                                                                                                                                                                                                                                                                                                                                                                                                                                                                                                                                                                                                                                                                                                                                                                                                                                                                                                               | 4                                                                                   |                                    |                      |       |                                                            |                   |            |                                                                                   |       |             |                                                                                  |       |    |                                                                                 |                        |       |              |                      |             |                             |       |                |                                           |       |    |                          |           |       |                              |                |           |        |       |                        |                          |       |    |                             |             |       |                              |       |             |                                |       |      |                        |       |    |       |        |       |    |         |         |       |    |         |         |       |    |                        |  |       |  |
| Being addicted to medicine                                                                                                                                                                                                                 | .....                                                                                                                                                                                                                                                                                                                                                                                                                                                                                                                                                                                                                                                                                                                                                                                                                                                                                                                                                                                                                                                                                                                                                                                                                                                                                               | 5                                                                                   |                                    |                      |       |                                                            |                   |            |                                                                                   |       |             |                                                                                  |       |    |                                                                                 |                        |       |              |                      |             |                             |       |                |                                           |       |    |                          |           |       |                              |                |           |        |       |                        |                          |       |    |                             |             |       |                              |       |             |                                |       |      |                        |       |    |       |        |       |    |         |         |       |    |         |         |       |    |                        |  |       |  |
| Drug allergy                                                                                                                                                                                                                               | .....                                                                                                                                                                                                                                                                                                                                                                                                                                                                                                                                                                                                                                                                                                                                                                                                                                                                                                                                                                                                                                                                                                                                                                                                                                                                                               | 6                                                                                   |                                    |                      |       |                                                            |                   |            |                                                                                   |       |             |                                                                                  |       |    |                                                                                 |                        |       |              |                      |             |                             |       |                |                                           |       |    |                          |           |       |                              |                |           |        |       |                        |                          |       |    |                             |             |       |                              |       |             |                                |       |      |                        |       |    |       |        |       |    |         |         |       |    |         |         |       |    |                        |  |       |  |
| Lueng yah (drug resistance)                                                                                                                                                                                                                | .....                                                                                                                                                                                                                                                                                                                                                                                                                                                                                                                                                                                                                                                                                                                                                                                                                                                                                                                                                                                                                                                                                                                                                                                                                                                                                               | 7                                                                                   |                                    |                      |       |                                                            |                   |            |                                                                                   |       |             |                                                                                  |       |    |                                                                                 |                        |       |              |                      |             |                             |       |                |                                           |       |    |                          |           |       |                              |                |           |        |       |                        |                          |       |    |                             |             |       |                              |       |             |                                |       |      |                        |       |    |       |        |       |    |         |         |       |    |         |         |       |    |                        |  |       |  |
| Answer does not relate to drug resistance                                                                                                                                                                                                  | .....                                                                                                                                                                                                                                                                                                                                                                                                                                                                                                                                                                                                                                                                                                                                                                                                                                                                                                                                                                                                                                                                                                                                                                                                                                                                                               | 8                                                                                   |                                    |                      |       |                                                            |                   |            |                                                                                   |       |             |                                                                                  |       |    |                                                                                 |                        |       |              |                      |             |                             |       |                |                                           |       |    |                          |           |       |                              |                |           |        |       |                        |                          |       |    |                             |             |       |                              |       |             |                                |       |      |                        |       |    |       |        |       |    |         |         |       |    |         |         |       |    |                        |  |       |  |
| Other (specify)                                                                                                                                                                                                                            | .....                                                                                                                                                                                                                                                                                                                                                                                                                                                                                                                                                                                                                                                                                                                                                                                                                                                                                                                                                                                                                                                                                                                                                                                                                                                                                               | 98                                                                                  |                                    |                      |       |                                                            |                   |            |                                                                                   |       |             |                                                                                  |       |    |                                                                                 |                        |       |              |                      |             |                             |       |                |                                           |       |    |                          |           |       |                              |                |           |        |       |                        |                          |       |    |                             |             |       |                              |       |             |                                |       |      |                        |       |    |       |        |       |    |         |         |       |    |         |         |       |    |                        |  |       |  |
| "Don't know"                                                                                                                                                                                                                               | .....                                                                                                                                                                                                                                                                                                                                                                                                                                                                                                                                                                                                                                                                                                                                                                                                                                                                                                                                                                                                                                                                                                                                                                                                                                                                                               | 99                                                                                  |                                    |                      |       |                                                            |                   |            |                                                                                   |       |             |                                                                                  |       |    |                                                                                 |                        |       |              |                      |             |                             |       |                |                                           |       |    |                          |           |       |                              |                |           |        |       |                        |                          |       |    |                             |             |       |                              |       |             |                                |       |      |                        |       |    |       |        |       |    |         |         |       |    |         |         |       |    |                        |  |       |  |
| <p><b>16.9.</b> Can your drug resistance ("due yah") spread to other people, for example if you sneeze on them?</p>                                                                                                                        | <table border="0"> <tr><td>Desirable attitude/knowledge</td><td>.....</td><td>1</td></tr> <tr><td>Undesirable attitude/knowledge</td><td>.....</td><td>0</td></tr> <tr><td>No attitude / refuse to answer (respondent is aware, but doesn't reveal attitude)</td><td>.....</td><td>97</td></tr> <tr><td>Answer does not apply to question (respondent may be aware/unaware; satisficing)</td><td>.....</td><td>98</td></tr> <tr><td>Not aware of this medicine (awkward, cannot answer but does not try to satisfy)</td><td>.....</td><td>99</td></tr> </table>                                                                                                                                                                                                                                                                                                                                                                                                                                                                                                                                                                                                                                                                                                                                     |                                                                                     | Desirable attitude/knowledge       | .....                | 1     | Undesirable attitude/knowledge                             | .....             | 0          | No attitude / refuse to answer (respondent is aware, but doesn't reveal attitude) | ..... | 97          | Answer does not apply to question (respondent may be aware/unaware; satisficing) | ..... | 98 | Not aware of this medicine (awkward, cannot answer but does not try to satisfy) | .....                  | 99    |              |                      |             |                             |       |                |                                           |       |    |                          |           |       |                              |                |           |        |       |                        |                          |       |    |                             |             |       |                              |       |             |                                |       |      |                        |       |    |       |        |       |    |         |         |       |    |         |         |       |    |                        |  |       |  |
| Desirable attitude/knowledge                                                                                                                                                                                                               | .....                                                                                                                                                                                                                                                                                                                                                                                                                                                                                                                                                                                                                                                                                                                                                                                                                                                                                                                                                                                                                                                                                                                                                                                                                                                                                               | 1                                                                                   |                                    |                      |       |                                                            |                   |            |                                                                                   |       |             |                                                                                  |       |    |                                                                                 |                        |       |              |                      |             |                             |       |                |                                           |       |    |                          |           |       |                              |                |           |        |       |                        |                          |       |    |                             |             |       |                              |       |             |                                |       |      |                        |       |    |       |        |       |    |         |         |       |    |         |         |       |    |                        |  |       |  |
| Undesirable attitude/knowledge                                                                                                                                                                                                             | .....                                                                                                                                                                                                                                                                                                                                                                                                                                                                                                                                                                                                                                                                                                                                                                                                                                                                                                                                                                                                                                                                                                                                                                                                                                                                                               | 0                                                                                   |                                    |                      |       |                                                            |                   |            |                                                                                   |       |             |                                                                                  |       |    |                                                                                 |                        |       |              |                      |             |                             |       |                |                                           |       |    |                          |           |       |                              |                |           |        |       |                        |                          |       |    |                             |             |       |                              |       |             |                                |       |      |                        |       |    |       |        |       |    |         |         |       |    |         |         |       |    |                        |  |       |  |
| No attitude / refuse to answer (respondent is aware, but doesn't reveal attitude)                                                                                                                                                          | .....                                                                                                                                                                                                                                                                                                                                                                                                                                                                                                                                                                                                                                                                                                                                                                                                                                                                                                                                                                                                                                                                                                                                                                                                                                                                                               | 97                                                                                  |                                    |                      |       |                                                            |                   |            |                                                                                   |       |             |                                                                                  |       |    |                                                                                 |                        |       |              |                      |             |                             |       |                |                                           |       |    |                          |           |       |                              |                |           |        |       |                        |                          |       |    |                             |             |       |                              |       |             |                                |       |      |                        |       |    |       |        |       |    |         |         |       |    |         |         |       |    |                        |  |       |  |
| Answer does not apply to question (respondent may be aware/unaware; satisficing)                                                                                                                                                           | .....                                                                                                                                                                                                                                                                                                                                                                                                                                                                                                                                                                                                                                                                                                                                                                                                                                                                                                                                                                                                                                                                                                                                                                                                                                                                                               | 98                                                                                  |                                    |                      |       |                                                            |                   |            |                                                                                   |       |             |                                                                                  |       |    |                                                                                 |                        |       |              |                      |             |                             |       |                |                                           |       |    |                          |           |       |                              |                |           |        |       |                        |                          |       |    |                             |             |       |                              |       |             |                                |       |      |                        |       |    |       |        |       |    |         |         |       |    |         |         |       |    |                        |  |       |  |
| Not aware of this medicine (awkward, cannot answer but does not try to satisfy)                                                                                                                                                            | .....                                                                                                                                                                                                                                                                                                                                                                                                                                                                                                                                                                                                                                                                                                                                                                                                                                                                                                                                                                                                                                                                                                                                                                                                                                                                                               | 99                                                                                  |                                    |                      |       |                                                            |                   |            |                                                                                   |       |             |                                                                                  |       |    |                                                                                 |                        |       |              |                      |             |                             |       |                |                                           |       |    |                          |           |       |                              |                |           |        |       |                        |                          |       |    |                             |             |       |                              |       |             |                                |       |      |                        |       |    |       |        |       |    |         |         |       |    |         |         |       |    |                        |  |       |  |

OxTREC reference: 528-17

## ANTIBIOTICS AND ACTIVITY SPACES

| <b>Part IV: Household assets</b>                                                                                                                                                                   |                                                                                                                                                                                                                                                 |                                                                                                                                                                       |                                                                                                                       |  |
|----------------------------------------------------------------------------------------------------------------------------------------------------------------------------------------------------|-------------------------------------------------------------------------------------------------------------------------------------------------------------------------------------------------------------------------------------------------|-----------------------------------------------------------------------------------------------------------------------------------------------------------------------|-----------------------------------------------------------------------------------------------------------------------|--|
| We now come to the last part. Can you please provide me with some information about your household?                                                                                                |                                                                                                                                                                                                                                                 |                                                                                                                                                                       |                                                                                                                       |  |
| <b>17.</b> How many rooms does this house have apart from toilet and hallways?                                                                                                                     | Number of rooms: _____                                                                                                                                                                                                                          |                                                                                                                                                                       |                                                                                                                       |  |
| <b>18.</b> What is the electricity situation in your household on a typical day?                                                                                                                   | Power at all times, no power cuts (90-100%) ..... 1<br>Power most of the time, occasional power cuts (>50%) ..... 2<br>Power sometimes, frequent power cuts (<50%) ..... 3<br>No electricity ..... 4                                            |                                                                                                                                                                       |                                                                                                                       |  |
| <b>19.</b> What kind of toilet does this house have and is it shared with other people in this community?<br><i>[if more than one, choose "best" toilet] [use show card to facilitate answers]</i> | Unshared flush toilet (e.g. piped sewer system, septic tank, pour flush toilet)..... 1<br>Shared (flush or non-flush) toilet with other community members or public toilet 2<br>No facility, Bush, Field, or others ..... 3                     |                                                                                                                                                                       |                                                                                                                       |  |
| <b>20.</b> What is the drinking water source of this house and is it shared with other people in this community?<br><i>[use show card to facilitate answers]</i>                                   | Water piped into house or yard..... 1<br>Water not directly piped into house or yard (e.g. well, borehole, water from spring, rainwater, tanker truck, surface water including rivers, bottled water, etc.)2                                    |                                                                                                                                                                       |                                                                                                                       |  |
| <b>21.</b> What kind of fuel does this household use for cooking?                                                                                                                                  | Improved fuel source (e.g. Electricity, gas stove, etc.) ..... 1<br>Unimproved fuel source (e.g. Coal / Lignite, Charcoal, Wood, Straw / Shrubs / Grass, Animal dung, Agricultural crop residue) ..... 2<br>No food cooked in household ..... 3 |                                                                                                                                                                       |                                                                                                                       |  |
| <b>22.</b> I will now ask you for some items in your household. Please tell me...                                                                                                                  | Number of items in household: _____                                                                                                                                                                                                             |                                                                                                                                                                       |                                                                                                                       |  |
|                                                                                                                                                                                                    | <b>22.1.</b> Have you got a <i>functioning radio</i> in your household? If so, how many?                                                                                                                                                        | _____                                                                                                                                                                 |                                                                                                                       |  |
|                                                                                                                                                                                                    | <b>22.2.</b> Have you got a <i>functioning TV</i> in your household? If so, how many?                                                                                                                                                           | _____                                                                                                                                                                 |                                                                                                                       |  |
|                                                                                                                                                                                                    | <b>22.3.</b> Have you got a <i>functioning rice cooker</i> in your household? If so, how many?                                                                                                                                                  | _____                                                                                                                                                                 |                                                                                                                       |  |
|                                                                                                                                                                                                    | <b>22.4.</b> Have you got a <i>functioning landline telephone</i> in your household? If so, how many?                                                                                                                                           | _____                                                                                                                                                                 |                                                                                                                       |  |
|                                                                                                                                                                                                    | <b>22.5.</b> Have you got a <i>functioning mobile phone</i> in your household? If so, how many?                                                                                                                                                 | _____                                                                                                                                                                 |                                                                                                                       |  |
|                                                                                                                                                                                                    | <b>22.6.</b> Have you got a <i>functioning computer</i> in your household? If so, how many?                                                                                                                                                     | _____                                                                                                                                                                 |                                                                                                                       |  |
|                                                                                                                                                                                                    | <b>22.7.</b> Have you got a <i>functioning bicycle</i> in your household? If so, how many?                                                                                                                                                      | _____                                                                                                                                                                 |                                                                                                                       |  |
|                                                                                                                                                                                                    | <b>22.8.</b> Have you got a <i>functioning scooter, motorcycle, or tricycle</i> in your household? If so, how many?                                                                                                                             | _____                                                                                                                                                                 |                                                                                                                       |  |
|                                                                                                                                                                                                    | <b>22.9.</b> Have you got a <i>functioning car or truck</i> in your household? If so, how many?                                                                                                                                                 | _____                                                                                                                                                                 |                                                                                                                       |  |
|                                                                                                                                                                                                    | <b>22.10.</b> Have you got a <i>functioning tractor</i> in your household? If so, how many?                                                                                                                                                     | _____                                                                                                                                                                 |                                                                                                                       |  |
| <b>22.11.</b> Have you got a <i>functioning refrigerator or freezer</i> in your household? If so, how many?                                                                                        | _____                                                                                                                                                                                                                                           |                                                                                                                                                                       |                                                                                                                       |  |
| <b>23.</b> How long does it normally take you to get to the following places?                                                                                                                      | <b>23.1.</b> How long does it take to get to the nearest market?                                                                                                                                                                                | Less than 10 minutes ..... 1<br>10 to 29 minutes ..... 2<br>30 to 59 minutes ..... 3<br>60 to 119 minutes ..... 4<br>2 hours or more..... 5                           |                                                                                                                       |  |
|                                                                                                                                                                                                    | <b>23.2.</b> How long does it take to get to the village hall or the village head's house?                                                                                                                                                      | Less than 10 minutes ..... 1<br>10 to 29 minutes ..... 2<br>30 to 59 minutes ..... 3<br>60 to 119 minutes ..... 4<br>2 hours or more..... 5                           |                                                                                                                       |  |
|                                                                                                                                                                                                    | <b>23.3.</b> How long does it take to get to the nearest public or private doctor?                                                                                                                                                              | Less than 10 minutes ..... 1<br>10 to 29 minutes ..... 2<br>30 to 59 minutes ..... 3<br>60 to 119 minutes ..... 4<br>2 hours or more..... 5                           |                                                                                                                       |  |
|                                                                                                                                                                                                    | <b>24.</b> What is your religion?                                                                                                                                                                                                               | No religion .....0<br>Buddhist .....1<br>Christian .....2<br>Muslim .....3<br>Spirit (religious belief in Lao) .....4<br>Other (Specify) .....5<br>Don't know .....99 |                                                                                                                       |  |
|                                                                                                                                                                                                    |                                                                                                                                                                                                                                                 | <b>25.</b> What is your nationality?                                                                                                                                  | Thai .....1<br>Lao .....2<br>Myanmar/Burmese .....3<br>Chinese .....4<br>Other (Specify) .....9<br>Don't know .....99 |  |

OxTREC reference: 528-17

## ANTIBIOTICS AND ACTIVITY SPACES

|                                                                                              |                                        |    |
|----------------------------------------------------------------------------------------------|----------------------------------------|----|
| 26. What is your ethnic background?                                                          | Thai .....                             | 1  |
|                                                                                              | Tai Yai.....                           | 2  |
|                                                                                              | Akha (E-Koh).....                      | 3  |
|                                                                                              | Pakakeryor (Karen).....                | 4  |
|                                                                                              | Lahu (Muser) .....                     | 5  |
|                                                                                              | Lisu (Lisaw) .....                     | 6  |
|                                                                                              | Hmong (Meaw) .....                     | 7  |
|                                                                                              | Mien (Yao) .....                       | 8  |
|                                                                                              | Burmese.....                           | 9  |
|                                                                                              | Yunnan (Jin Haw).....                  | 10 |
|                                                                                              | Tai Lue (Tai) .....                    | 11 |
|                                                                                              | Lao.....                               | 21 |
|                                                                                              | Kathuic.....                           | 22 |
|                                                                                              | Bahnaric Khmer .....                   | 23 |
| Tai Thai.....                                                                                | 24                                     |    |
| Other (Specify) .....                                                                        | 30                                     |    |
| Don't know .....                                                                             | 99                                     |    |
| xi. Interview end time                                                                       | <b>[time entered automatically]</b>    |    |
| Thank you very much for participating in this survey. <b>[give gift to respondent]</b>       |                                        |    |
| <b>Part V: Interviewer observations [to be completed by interviewer after interview]</b>     |                                        |    |
| xii. Was the interview completed?                                                            | Yes.....                               | 1  |
|                                                                                              | Yes, with difficulties .....           | 2  |
|                                                                                              | No .....                               | 3  |
| xiii. Was someone else present during the interview?<br><b>[mark all that apply]</b>         | Survey supervisor.....                 | 1  |
|                                                                                              | Other household or family member ..... | 2  |
|                                                                                              | Medical practitioner.....              | 3  |
|                                                                                              | Government officer.....                | 4  |
|                                                                                              | Other (specify) .....                  | 5  |
| No one .....                                                                                 | 0                                      |    |
| xiv. What is your evaluation of the accuracy and trustworthiness of the informant's answers? | Very good .....                        | 1  |
|                                                                                              | Satisfactory.....                      | 2  |
|                                                                                              | Doubtful.....                          | 3  |
|                                                                                              | Very low.....                          | 4  |
| xv. Were there any unusual circumstances during the interview?                               | Please describe: _____                 |    |
