# Supplementary material for: Tales of treatment and new perspectives for global health research on antimicrobial resistance
Source: PubMed Central journal article supplement (PMC8639946; doi:10.1136/medhum-2020-011894), 2020-09-18
Supplement: medhum-2020-011894supp002.pdf [file medhum-2020-011894supp002.pdf]

## APPENDIX

Table A1. Comparison of antibiotic sources and use during acute illnesses and accidents across five age groups.

|                                                                                                | Chiang Rai Village (1 <sup>st</sup> survey round) |       |        |       |        |                 | All Three Workshop Villages |       |       |       |       |                 | Rural Chiang Rai Province |       |       |       |       |                 |
|------------------------------------------------------------------------------------------------|---------------------------------------------------|-------|--------|-------|--------|-----------------|-----------------------------|-------|-------|-------|-------|-----------------|---------------------------|-------|-------|-------|-------|-----------------|
|                                                                                                | 18-24                                             | 25-34 | 35-44  | 45-59 | 60+    | <i>p</i> -Value | 18-24                       | 25-34 | 35-44 | 45-59 | 60+   | <i>p</i> -Value | 18-24                     | 25-34 | 35-44 | 45-59 | 60+   | <i>p</i> -Value |
| <b>All illness episodes</b>                                                                    |                                                   |       |        |       |        |                 |                             |       |       |       |       |                 |                           |       |       |       |       |                 |
| <b>Number</b>                                                                                  | 9                                                 | 17    | 33     | 28    | 28     |                 | 65                          | 119   | 143   | 215   | 155   |                 | 32                        | 53    | 82    | 210   | 194   |                 |
| <b>% received antibiotics</b>                                                                  | 11.1%                                             | 23.5% | 15.2%  | 17.9% | 7.1%   | 0.798           | 15.4%                       | 20.2% | 13.3% | 13.0% | 12.3% | 0.086           | 5.4%                      | 16.7% | 30.1% | 20.1% | 14.8% | 0.059           |
| <b>All antibiotic use episodes</b>                                                             |                                                   |       |        |       |        |                 |                             |       |       |       |       |                 |                           |       |       |       |       |                 |
| <b>Number</b>                                                                                  | 1                                                 | 4     | 5      | 5     | 2      |                 | 10                          | 24    | 19    | 28    | 19    |                 | 3                         | 11    | 25    | 53    | 33    |                 |
| <b>% of antibiotic use episodes received from formal sources</b>                               | 100.0%                                            | 50.0% | 100.0% | 60.0% | 100.0% | 0.291           | 60.0%                       | 70.8% | 84.2% | 75.0% | 78.9% | 0.511           | 100.0%                    | 42.4% | 87.3% | 96.2% | 84.5% | 0.001           |
| <b>% of antibiotic use episodes received from informal sources</b>                             | 0.0%                                              | 50.0% | 0.0%   | 40.0% | 0.0%   | 0.291           | 20.0%                       | 37.5% | 15.8% | 28.6% | 21.1% | 0.532           | 0.0%                      | 14.2% | 2.5%  | 3.8%  | 1.6%  | 0.418           |
| <b>% of illness episodes with at least one instance of unfinished antibiotics</b>              | 100.0%                                            | 75.0% | 0.0%   | 60.0% | 50.0%  | 0.102           | 70.0%                       | 41.7% | 21.1% | 32.1% | 52.6% | 0.020           | 46.9%                     | 13.1% | 31.8% | 53.4% | 26.4% | 0.110           |
| <b>% of episodes with at least one instance of strict adherence to antibiotic instructions</b> | 100.0%                                            | 75.0% | 80.0%  | 20.0% | 100.0% | 0.240           | 50.0%                       | 70.8% | 78.9% | 60.7% | 68.4% | 0.107           | 40.3%                     | 31.3% | 87.5% | 74.8% | 81.8% | 0.006           |

Source: Authors, derived from survey data.

Notes. Data on illness episode level. Multiple illness episodes per respondent possible. Provincial-level results are population weighted using census data. *p*-values calculated using Pearson  $X^2$  test
